# Supplementary material for: Regional and global shifts in crop diversity through the Anthropocene
Source: PLoS One. 2019 Feb 6;14(2):e0209788. doi: 10.1371/journal.pone.0209788 (PMC6364885; doi:10.1371/journal.pone.0209788)
Supplement: S2 File — Base data file retrieved from the Food and Agricultural Organization data repository [18] employed in the analysis by Martin et al. 2019. (XLSX) [file pone.0209788.s002.xlsx]

## Sheet: Australia & New Zealand
	Agavefibresnes	Almondswithshell	Anisebadianfennelcoriander	Apples	Apricots	Arecanuts	Artichokes	Asparagus	Avocados	Bambarabeans	Bananas	Barley	Bastfibresother	Beansdry	Beansgreen	Berriesnes	Blueberries	Brazilnutswithshell	Broadbeanshorsebeansdry	Buckwheat	Cabbagesandotherbrassicas	Canaryseed	Carobs	Carrotsandturnips	Cashewapple	Cashewnutswithshell	Cassava	Cassavaleaves	Castoroilseed	Cauliflowersandbroccoli	Cerealsnes	Cherries	Cherriessour	Chestnut	Chickpeas	Chicoryroots	Chilliesandpeppersdry	Chilliesandpeppersgreen	Cinnamoncanella	Cloves	Cocoabeans	Coconuts	Coffeegreen	Coir	Cowpeasdry	Cranberries	Cucumbersandgherkins	Currants	Dates
Australia&NewZealand1961	0	0	0	29976	4119	0	0	2071	0	0	10353	991055	0	809	8758	246	0	0	400	0	3660	20824	0	2599	0	0	0	0	0	3802	2000	1356	0	0	0	0	0	0	0	0	0	0	0	0	0	0	755	390	0
Australia&NewZealand1962	0	0	0	30104	4131	0	0	2173	0	0	10353	851705	0	809	10077	260	0	0	405	0	3552	27844	0	2716	0	0	0	0	0	3945	2000	1363	0	0	0	0	0	0	0	0	0	0	0	0	0	0	691	407	0
Australia&NewZealand1963	0	0	0	31043	4345	0	0	2411	0	0	10971	850146	0	2023	11789	270	0	0	405	0	3781	15383	0	2974	0	0	0	0	0	4223	2000	1482	0	0	0	0	0	0	0	0	0	0	0	0	0	0	803	422	0
Australia&NewZealand1964	0	0	0	31594	4431	0	0	2496	0	0	10845	873337	0	1214	7555	237	0	0	202	0	4011	4627	0	3063	0	0	0	0	0	4509	2000	1499	0	0	0	0	0	0	0	0	0	0	0	0	0	0	804	387	0
Australia&NewZealand1965	0	0	0	32512	4170	0	0	2459	0	0	9792	965056	0	1214	7819	235	0	0	202	0	4008	5439	0	3207	0	0	0	0	0	4055	2000	1441	0	0	0	0	0	0	0	0	0	0	0	0	0	0	729	350	0
Australia&NewZealand1966	0	0	0	32670	4185	0	0	2525	0	0	9411	1044770	0	2023	8214	236	0	0	206	0	3564	1796	0	3287	0	0	0	0	0	3768	2300	1537	0	0	0	0	0	0	0	0	0	0	0	0	0	0	879	319	0
Australia&NewZealand1967	0	0	0	32832	4249	0	0	2632	0	0	9130	1094038	0	2428	8645	196	0	0	202	0	3581	2889	0	3507	0	0	0	0	0	3749	2300	1569	0	0	0	0	0	0	0	0	0	0	0	0	0	0	1008	258	0
Australia&NewZealand1968	0	0	0	32483	4043	0	0	2517	0	0	9354	1403720	0	4053	8611	216	0	0	202	0	3784	9524	0	3630	0	0	0	0	0	3801	2300	1520	0	0	0	0	0	0	0	0	0	0	0	0	0	0	1096	281	0
Australia&NewZealand1969	0	0	0	33144	4001	0	0	2597	0	0	9457	1584713	0	5266	9115	219	0	0	202	0	4082	27667	0	4022	0	0	0	0	0	4094	2300	1511	0	0	0	0	0	0	0	0	0	0	0	0	0	0	959	279	0
Australia&NewZealand1970	0	0	0	33591	3932	0	0	2791	0	0	9420	2056137	0	4644	8544	232	0	0	202	0	3882	8869	0	4092	0	0	0	0	0	3966	2000	1573	0	0	0	0	0	0	0	0	0	0	0	0	0	0	1070	288	0
Australia&NewZealand1971	0	0	0	33959	3986	0	0	2835	0	0	9409	2616799	0	8412	8936	275	0	0	200	0	3870	6260	0	3835	0	0	0	0	0	3862	2000	1651	0	0	0	0	0	0	0	0	0	0	0	0	0	0	1041	300	0
Australia&NewZealand1972	0	0	0	34051	4027	0	0	3532	0	0	9027	2236165	0	9516	8689	269	2	0	200	0	3814	6901	0	3859	0	0	0	0	0	3718	2000	1792	0	0	0	0	0	0	0	0	0	0	0	0	0	0	1200	313	0
Australia&NewZealand1973	0	0	0	31292	3955	0	0	2974	0	0	8593	1968224	0	4523	9346	267	2	0	233	0	3911	9954	0	4223	0	0	0	0	0	3692	2500	1742	0	0	0	0	0	0	0	0	0	0	0	0	0	0	1196	306	0
Australia&NewZealand1974	0	0	0	28235	3644	0	0	2454	32	0	8075	1912693	0	3230	10117	306	2	0	189	0	4189	6771	0	4668	0	0	0	0	0	3851	2500	1667	0	0	0	0	0	0	0	0	0	0	0	0	0	0	1180	377	0
Australia&NewZealand1975	0	0	0	26202	3399	0	0	3127	20	0	7280	2433495	0	7592	8992	308	2	0	6360	0	3873	18000	0	4406	0	0	0	0	0	3790	2500	1532	0	0	0	0	0	0	0	0	0	0	0	0	0	0	1088	378	0
Australia&NewZealand1976	0	0	0	24838	3204	0	0	2452	52	0	6875	2405702	0	8224	8391	306	5	0	15038	0	3919	20781	0	4368	0	0	0	0	0	3769	2500	1469	0	0	0	0	0	0	0	0	0	0	0	0	0	0	1224	384	0
Australia&NewZealand1977	0	0	0	24047	2961	0	0	1892	113	0	6679	2876964	0	10360	8473	280	8	0	6835	0	4421	31054	0	4419	0	0	0	0	0	3809	2600	1397	0	0	0	0	0	0	0	0	0	0	0	0	0	0	1227	397	0
Australia&NewZealand1978	0	0	0	23396	2942	0	0	2005	126	0	6148	2855837	0	4784	9340	384	8	0	12000	0	4770	18313	0	4733	0	0	0	0	0	4503	2600	1360	0	0	0	0	0	40	0	0	0	0	0	0	0	0	1292	516	0
Australia&NewZealand1979	0	0	0	23600	2930	0	0	1914	153	0	6878	2559872	0	4297	8501	459	14	0	10000	0	4605	11831	0	4832	0	0	0	0	0	4548	2600	1332	0	0	0	0	0	44	0	0	0	0	0	0	0	0	1361	996	0
Australia&NewZealand1980	0	1430	0	24244	2951	0	0	1996	209	0	7109	2517461	0	3314	7448	988	130	0	10000	0	3796	6275	0	4886	0	0	0	0	0	4145	1320	1060	0	0	0	0	0	47	0	0	0	0	0	0	0	0	1390	1622	0
Australia&NewZealand1981	0	1450	0	24061	2861	0	0	2538	321	0	7603	2752383	0	5690	8051	864	304	0	11300	0	4029	8070	0	4779	0	0	0	0	0	4448	2257	1318	0	0	0	0	0	56	0	0	0	0	0	0	0	0	1505	1692	0
Australia&NewZealand1982	0	1480	0	24408	2901	0	0	3349	520	0	7571	2539864	0	21748	7928	849	450	0	18800	0	4239	11640	0	4747	0	0	0	0	0	5442	806	1362	0	0	0	0	0	50	0	0	0	0	0	0	0	0	1387	1924	0
Australia&NewZealand1983	0	1560	21	25056	2928	0	0	3865	992	0	7844	3190293	0	23017	7801	830	487	0	22300	0	4359	9401	0	5295	0	0	0	0	0	5976	855	1320	0	0	3100	0	0	60	0	0	0	0	0	0	0	0	1304	1527	0
Australia&NewZealand1984	0	1700	20	25224	3000	0	0	4005	1062	0	8129	3643520	0	30390	7322	754	516	0	33400	0	4067	8982	0	5552	0	0	0	0	0	6508	1368	1335	0	0	6400	0	0	60	0	0	0	0	0	0	7782	0	1330	1568	0
Australia&NewZealand1985	0	1950	25	25666	3130	0	0	4310	3917	0	7832	3390332	0	41006	6574	749	606	0	19400	0	4120	14227	0	5196	0	0	0	0	0	7294	1167	1366	0	0	26400	0	0	1006	0	0	0	0	0	0	6394	0	1340	1154	0
Australia&NewZealand1986	0	2300	1994	27018	2978	0	0	4745	4225	0	7659	2412551	0	57932	6894	673	566	0	38000	0	3690	15199	0	5592	0	0	0	0	0	8033	1553	1420	0	0	67702	0	0	1169	0	0	0	0	0	0	8400	0	1395	849	0
Australia&NewZealand1987	0	2400	2270	27685	3076	0	0	4991	4236	0	7769	2445400	0	36235	6742	729	553	0	51101	0	3766	13000	0	5595	0	0	0	0	0	8364	2560	1548	0	0	54870	0	0	1346	0	0	0	0	0	0	14400	0	1389	806	0
Australia&NewZealand1988	0	2600	2796	28800	3342	0	0	5064	4396	0	7969	2270612	0	38302	7765	722	532	0	51537	0	3608	11180	0	5850	0	0	0	0	0	8647	2178	1789	0	0	67540	0	0	1317	0	0	0	0	0	0	13700	0	1339	767	0
Australia&NewZealand1989	0	2900	3259	30016	3577	0	0	5027	4414	0	7941	2393835	0	24572	8138	671	495	0	45670	0	3606	12422	0	5935	0	0	0	0	0	9001	2000	1809	0	0	93077	0	0	1357	0	0	0	0	0	0	7000	0	1591	724	0
Australia&NewZealand1990	0	3000	1073	32430	3804	0	0	4318	4254	0	7924	2543800	0	29788	7416	501	346	0	57008	0	3684	11844	0	5533	0	0	0	0	0	9065	2295	2003	0	0	177421	0	0	1412	0	0	0	0	0	0	3886	0	1578	791	0
Australia&NewZealand1991	0	3100	1666	31730	3710	0	0	6050	4300	0	7962	2731200	0	32174	7578	536	350	0	58100	0	3649	11021	0	5978	0	0	0	0	0	9170	2193	1687	0	0	249671	0	0	1309	0	0	0	0	0	0	4578	0	1288	841	0
Australia&NewZealand1992	0	3900	2137	31983	3684	0	0	7519	4508	0	8159	3012400	0	38000	7428	614	328	0	82000	0	3580	4763	0	5861	0	0	0	0	0	10083	1840	1772	0	0	150802	0	0	1442	0	0	0	0	0	0	9321	0	1224	870	0
Australia&NewZealand1993	0	4600	3938	32637	3824	0	0	4600	4454	0	8656	3501870	0	27800	7292	623	340	0	87000	0	2831	7382	0	6066	0	0	0	0	0	10200	1537	1793	0	0	146837	0	0	1477	0	0	0	0	0	0	6304	0	1173	895	0
Australia&NewZealand1994	0	4670	5390	34977	4124	0	0	4900	4875	0	8756	2544990	0	38100	7400	531	357	0	86000	0	3183	7000	0	6804	0	0	0	0	0	9631	1770	1809	0	0	208854	0	0	1579	0	0	0	0	0	0	0	0	1075	840	0
Australia&NewZealand1995	0	4700	2585	35666	4141	0	0	5785	5488	0	8281	3176790	0	41100	6857	466	377	0	80400	0	3563	6000	0	9290	0	0	0	0	0	10873	1647	1898	0	0	216415	0	0	1668	0	0	0	0	0	0	0	0	1060	851	0
Australia&NewZealand1996	0	4730	984	35569	4065	0	0	5377	5673	0	8893	3441300	0	52700	8002	532	280	0	97000	0	3793	4442	0	9964	0	0	0	0	0	12247	3000	1894	0	0	241500	0	0	1753	0	0	0	0	0	0	0	0	1106	777	0
Australia&NewZealand1997	0	4800	1998	35555	4220	0	0	4633	6300	0	9589	3597600	0	44000	8899	538	200	0	154800	0	3130	7262	0	8346	0	0	0	0	0	12358	2986	1920	0	0	273000	0	0	1994	0	0	0	0	0	0	0	0	1002	653	0
Australia&NewZealand1998	0	4850	3903	34760	3774	0	0	3905	5946	0	10478	3225900	0	54000	7623	582	256	0	135300	0	3029	7500	0	8652	0	0	0	0	0	12739	2963	2050	0	0	308500	0	0	1930	0	0	0	0	0	0	0	0	1139	760	0
Australia&NewZealand1999	0	5000	3080	34260	4059	0	0	4043	7200	0	11405	2644800	0	52000	6917	608	220	0	146800	0	2771	8000	0	8514	0	0	0	0	0	11955	3500	1820	0	0	218000	0	0	2431	0	0	0	0	0	0	0	0	920	774	0
Australia&NewZealand2000	0	5840	894	33814	3859	0	0	4697	8204	0	13436	3508500	0	52000	7849	600	348	0	178000	0	2743	8500	0	9489	0	0	0	0	0	11823	3130	1915	0	0	262000	0	0	2619	0	0	0	0	0	0	0	0	1116	1022	0
Australia&NewZealand2001	0	5907	463	37915	4443	0	0	4502	8100	0	11737	3777192	0	47200	7407	642	350	0	180000	0	2862	7894	0	10492	0	0	0	0	0	12714	3078	1873	0	0	195000	0	0	2662	0	0	0	0	0	0	0	0	1100	1266	0
Australia&NewZealand2002	0	6505	300	33717	3636	0	0	4378	9106	0	12583	3942097	0	49100	7345	630	366	0	175073	0	2641	8331	0	9503	0	0	0	0	0	5222	3200	1870	0	0	201161	0	0	2579	0	0	0	0	0	0	0	0	1207	1527	0
Australia&NewZealand2003	0	8114	301	31580	3690	0	0	4301	10249	0	10659	4541700	0	26678	7731	782	384	0	155000	0	2746	8373	0	9167	0	0	0	0	0	12363	2400	2200	0	0	200815	0	0	2645	0	0	0	0	0	0	0	0	1095	1724	0
Australia&NewZealand2004	0	10453	533	31434	2953	0	0	3745	11463	0	10861	4695658	0	33597	7887	950	400	0	194500	0	2846	8352	0	9035	0	0	0	0	0	11732	2700	2195	0	0	110173	0	0	2997	0	0	0	0	0	0	0	0	1240	1715	0
Australia&NewZealand2005	0	13120	442	31480	5328	0	0	3676	9902	0	10361	4455825	0	40380	6804	1102	433	0	183000	0	2800	8382	0	8430	0	0	0	0	0	12132	1700	2144	0	0	105300	0	0	2537	0	0	0	0	0	0	0	0	1200	1604	0
Australia&NewZealand2006	0	18799	640	29720	6500	0	0	2866	10200	0	11168	4229057	0	28000	7996	1259	462	0	186637	0	2865	5000	0	7764	0	0	0	0	0	4084	1200	2150	0	0	244000	0	0	2787	0	0	0	0	0	0	0	0	682	1709	0
Australia&NewZealand2007	0	25702	1530	28945	5637	0	0	2173	13804	0	11662	4953319	0	44291	5702	1287	522	0	133000	0	2788	7000	0	7215	0	0	0	0	0	4440	2267	2320	0	0	306000	0	0	2478	0	0	0	0	0	0	0	0	579	1517	0
Australia&NewZealand2008	0	27579	1540	27798	5895	0	0	2304	13664	0	9853	5082446	0	45000	5692	1180	450	0	129000	0	2657	8000	0	6637	0	0	0	0	0	3768	2189	2291	0	0	338223	0	0	2466	0	0	0	0	0	0	0	0	418	1510	0
Australia&NewZealand2009	0	27981	1430	31284	5240	0	0	2255	12631	0	11992	4523669	0	54585	5985	1055	539	0	134000	0	2825	7463	0	6655	0	0	0	0	0	3957	2200	2997	0	0	363000	0	0	2408	0	0	0	0	0	0	0	0	470	1356	0
Australia&NewZealand2010	0	29340	1517	28742	5775	0	0	2532	13359	0	11543	4140340	0	44900	6757	592	543	0	129000	0	2783	7435	0	7119	0	0	0	0	0	4649	2008	2650	0	0	429000	0	0	2473	0	0	0	0	0	0	0	0	639	1394	0
Australia&NewZealand2011	0	30390	654	30980	6773	0	0	2668	13476	0	11196	3745862	0	86400	7564	1220	549	0	162600	0	2717	7500	0	6032	0	0	0	0	0	3944	1727	2337	0	0	653142	0	0	2546	0	0	0	0	0	0	0	0	649	1324	0
Australia&NewZealand2012	0	28472	453	30241	6734	0	0	2754	14149	0	13496	3783964	0	55000	8186	1159	579	0	151400	0	2877	8000	0	7575	0	0	0	0	0	4648	2063	2617	0	0	456070	0	0	2329	0	0	0	0	0	0	0	0	671	1510	0
Australia&NewZealand2013	0	28586	443	30337	6771	0	0	2348	15059	0	14218	3264328	0	38000	7177	1075	583	0	202900	0	2873	7800	0	6384	0	0	0	0	0	4735	1518	3639	0	0	573600	0	0	1762	0	0	0	0	0	0	0	0	692	1640	0
Australia&NewZealand2014	0	28967	434	28515	6780	0	0	2248	12893	0	12880	3873450	0	35000	7074	1041	621	0	152100	0	2937	7454	0	6157	0	0	0	0	0	10123	1706	2805	0	0	507800	0	0	2523	0	0	0	0	0	0	0	0	756	1571	0
[truncated: 108 more columns]

## Sheet: Caribbean
	Agavefibresnes	Almondswithshell	Anisebadianfennelcoriander	Apples	Apricots	Arecanuts	Artichokes	Asparagus	Avocados	Bambarabeans	Bananas	Barley	Bastfibresother	Beansdry	Beansgreen	Berriesnes	Blueberries	Brazilnutswithshell	Broadbeanshorsebeansdry	Buckwheat	Cabbagesandotherbrassicas	Canaryseed	Carobs	Carrotsandturnips	Cashewapple	Cashewnutswithshell	Cassava	Cassavaleaves	Castoroilseed	Cauliflowersandbroccoli	Cerealsnes	Cherries	Cherriessour	Chestnut	Chickpeas	Chicoryroots	Chilliesandpeppersdry	Chilliesandpeppersgreen	Cinnamoncanella	Cloves	Cocoabeans	Coconuts	Coffeegreen	Coir	Cowpeasdry	Cranberries	Cucumbersandgherkins	Currants	Dates
Caribbean1961	10000	0	0	0	0	0	0	0	2040	0	127260	0	1000	192905	262	0	0	0	4960	0	2679	0	0	508	0	0	118701	0	5730	53	0	0	0	0	120	0	1170	1725	0	0	126050	99874	482475	0	63375	0	998	0	0
Caribbean1962	10000	0	0	0	0	0	0	0	2000	0	132000	0	1000	193134	282	0	0	0	5162	0	2878	0	0	503	0	0	120057	0	3932	58	0	0	0	0	125	0	1170	1777	0	0	126430	98200	481475	0	65405	0	880	0	0
Caribbean1963	10000	0	0	0	0	0	0	0	2050	0	135458	0	2000	194530	295	0	0	0	5265	0	3184	0	0	599	0	0	122306	0	3535	58	0	0	0	0	125	0	1170	1793	0	0	131940	102300	461390	0	67440	0	936	0	0
Caribbean1964	10000	0	0	0	0	0	0	0	2180	0	129579	0	2300	196411	442	0	0	0	6360	0	3278	0	0	965	0	0	123161	0	2635	33	0	0	0	0	100	0	1170	1979	0	0	127190	101000	471390	0	70380	0	1338	0	0
Caribbean1965	10000	0	0	0	0	0	0	0	1880	0	135223	0	4000	192448	462	0	0	0	6255	0	3381	0	0	1078	0	0	129227	0	2536	38	0	0	0	0	100	0	1170	2151	0	0	118750	100200	461305	0	74330	0	1841	0	0
Caribbean1966	10000	0	0	0	0	0	0	0	1430	0	121559	0	6600	203044	617	0	0	0	6120	0	3427	0	0	1200	0	0	129932	0	1370	95	0	0	0	0	150	0	1170	2640	0	0	121840	102200	466305	0	78520	0	1693	0	0
Caribbean1967	10000	0	0	0	0	0	0	0	1780	0	122035	0	7193	193456	625	0	0	0	6320	0	4246	0	0	1644	0	0	131390	0	1870	53	0	0	0	0	150	0	1170	3337	0	0	119140	102300	466035	0	78770	0	2231	0	0
Caribbean1968	10000	0	0	0	0	0	0	0	1495	0	118740	0	6537	163497	707	0	0	0	6221	0	4221	0	0	1674	0	0	131982	0	1970	65	0	0	0	0	160	0	1170	2466	0	0	121590	104900	458800	0	80767	0	2172	0	0
Caribbean1969	10000	0	0	0	0	0	0	0	1078	0	119683	0	2018	162884	730	0	0	0	6480	0	4020	0	0	1625	0	0	137544	0	2070	47	0	0	0	0	170	0	1170	3012	0	0	114190	107845	432144	0	80536	0	1867	0	0
Caribbean1970	10000	0	0	0	0	0	0	0	1550	0	114024	0	2000	155963	592	0	0	0	6431	0	4117	0	0	1853	0	0	140227	0	1780	62	0	0	0	0	190	0	1160	2714	0	0	151640	102300	394355	0	82503	0	2862	0	0
Caribbean1971	10000	0	0	0	0	0	0	0	1600	0	116169	0	2000	163986	845	0	0	0	6473	0	4927	0	0	2087	0	0	144009	0	1390	68	0	0	0	0	190	0	1300	3070	0	0	135440	105500	416854	0	82623	0	3545	0	0
Caribbean1972	10000	0	0	0	0	0	0	0	1710	0	117676	0	3000	168433	800	0	0	0	6723	0	5166	0	0	2481	0	0	148213	0	1600	70	0	0	0	0	200	0	1280	3474	0	0	151590	105800	417344	0	84681	0	6441	0	0
Caribbean1973	10000	0	0	0	0	0	0	0	1770	0	114646	0	3000	150405	257	0	0	0	6567	0	4760	0	0	2421	0	0	150718	0	1820	72	0	0	0	0	200	0	1300	3796	0	0	149120	105837	454339	0	82586	0	7308	0	0
Caribbean1974	10000	0	0	0	0	0	0	0	1710	0	118005	0	18850	156861	254	0	0	0	6598	0	5803	0	0	2338	0	0	149645	0	2930	74	0	0	0	0	200	0	1370	3748	0	0	153190	98200	460333	0	82788	0	7192	0	0
Caribbean1975	10000	0	0	0	0	0	0	0	2136	0	117014	0	21530	142815	266	0	0	0	6582	0	5453	0	0	2035	0	0	157146	0	2940	75	0	0	0	0	210	0	1380	4021	0	0	132940	102700	441072	0	74002	0	10147	0	0
Caribbean1976	10000	0	0	0	0	0	0	0	1900	0	121683	0	21600	151574	268	0	0	0	6659	0	5713	0	0	2767	0	0	154229	0	2950	77	0	0	0	0	220	0	1380	4502	0	0	140490	103400	471506	0	70737	0	7612	0	0
Caribbean1977	10000	0	0	0	0	0	0	0	1700	0	124857	0	16365	171490	305	0	0	0	7297	0	4815	0	0	2240	0	0	158985	0	2950	79	0	0	0	0	230	0	1500	5784	0	0	144690	107400	382235	0	60981	0	6570	0	0
Caribbean1978	10000	0	0	0	0	0	0	0	1960	0	128833	0	11340	182223	235	0	0	0	7783	0	5754	0	0	2448	0	0	155116	0	2950	82	0	0	0	0	230	0	1590	6155	0	0	145814	98700	375667	0	103385	0	6231	0	0
Caribbean1979	10000	0	0	0	0	0	0	0	1570	0	131080	0	15830	164098	270	0	0	0	7897	0	4938	0	0	2677	0	0	136125	0	2950	85	0	0	0	0	240	0	1410	7176	0	0	149798	98500	428648	0	108914	0	5229	0	0
Caribbean1980	10000	0	0	0	0	0	0	0	1470	0	125623	0	10200	181368	263	0	0	0	8526	0	5454	0	0	2926	0	0	122903	0	2950	82	0	0	0	0	250	0	1380	6823	0	0	138749	98000	449259	0	86088	0	8513	0	0
Caribbean1981	10000	0	0	0	0	0	0	0	1300	0	127838	0	16510	180105	165	0	0	0	8828	0	6373	0	0	3151	0	0	128054	0	2960	77	0	0	0	0	260	0	1410	6081	0	0	145308	101800	411095	0	85957	0	7157	0	0
Caribbean1982	10000	0	0	0	0	0	0	0	1670	0	128049	0	15770	180958	213	0	0	0	9697	0	6450	0	0	2992	0	0	123537	0	3160	64	0	0	0	0	260	0	1370	6251	0	0	182309	102100	413680	0	85821	0	7922	0	0
Caribbean1983	10000	0	0	0	0	0	0	0	1700	0	129049	0	19885	186365	238	0	0	0	10745	0	6051	0	0	3277	0	0	139807	0	3260	49	0	0	0	0	260	0	1590	5456	0	0	183983	102300	422012	0	86154	0	9802	0	0
Caribbean1984	10000	0	0	0	0	0	0	0	1620	0	129027	0	19800	185635	232	0	0	0	9314	0	6425	0	0	2900	0	0	134857	0	3260	60	0	0	0	0	310	0	1800	5703	0	0	167416	104500	438053	0	86134	0	9931	0	0
Caribbean1985	10000	0	0	300	0	0	0	0	28055	0	132719	0	19200	196907	252	0	0	0	10321	0	5759	0	0	2495	0	5000	131520	0	2800	69	0	0	0	0	220	0	1612	5757	35	0	158045	114250	425227	0	85964	0	8638	0	0
Caribbean1986	10000	0	0	300	0	0	0	0	28027	0	143795	0	13300	158243	302	0	0	0	10250	0	6152	0	0	2343	0	5000	139087	0	3000	56	0	0	0	0	230	0	1462	6067	35	0	170298	127250	374212	0	82735	0	9767	0	0
Caribbean1987	10000	0	0	300	0	0	0	0	27960	0	142310	0	11900	200010	224	0	0	0	10258	0	5691	0	0	2953	0	5000	141755	0	3000	52	0	0	0	0	230	0	1422	6742	35	0	222352	125400	370483	0	83273	0	10653	0	0
Caribbean1988	10000	0	0	300	0	0	0	0	27930	0	141842	0	3900	203580	241	0	0	0	10702	0	5541	0	0	2732	0	5000	158903	0	2800	65	0	0	0	0	240	0	1472	8435	35	0	169410	145275	379056	0	72646	0	13167	0	0
Caribbean1989	10000	0	0	280	0	0	0	0	27897	0	142700	0	16200	202679	202	0	0	0	10695	0	5020	0	0	2998	0	5000	169417	0	2800	70	0	0	0	0	240	0	1462	7663	35	0	160183	125078	374332	0	63569	0	15838	0	0
Caribbean1990	8863	0	0	320	0	0	0	0	12799	0	126828	0	10000	196606	206	0	0	0	11269	0	5054	0	0	2719	0	4841	172822	0	2600	85	0	0	0	0	216	9	1513	9304	38	0	166339	129292	319933	0	55578	0	15978	0	0
Caribbean1991	20809	0	0	270	0	0	0	0	12324	0	121911	0	8295	196040	225	0	0	0	11683	0	5009	0	0	2772	0	5712	174370	0	2294	94	0	0	0	0	0	9	1550	9383	23	0	161413	151902	357653	0	50588	0	15988	0	0
Caribbean1992	18825	0	0	280	0	0	0	0	11877	0	144952	0	7027	239918	219	0	0	0	11666	0	9593	0	0	2952	0	5714	174866	0	2200	75	0	0	0	0	0	9	692	12414	50	0	157717	161040	329583	0	52160	0	8202	0	0
Caribbean1993	18381	0	0	335	0	0	0	0	12176	0	136327	0	5998	227281	215	0	0	0	11704	0	8879	0	0	3106	0	5715	189399	0	2150	83	0	0	0	0	0	9	746	13004	60	0	167644	171744	337397	0	50520	0	7972	0	0
Caribbean1994	17944	0	0	345	0	0	0	0	12790	0	129447	0	5190	219018	229	0	0	0	12755	0	8169	0	0	3356	0	5716	174869	0	2100	125	0	0	0	0	0	9	976	6725	60	0	173409	161996	342445	0	48887	0	15951	0	0
Caribbean1995	17514	0	0	335	0	0	0	0	16098	0	131662	0	4536	187585	225	0	0	0	13195	0	11856	0	0	3513	0	5717	187328	0	2157	166	0	0	0	0	0	9	1041	9342	65	0	203311	152146	328219	0	43482	0	15781	0	0
Caribbean1996	17089	0	0	305	0	0	0	0	17236	0	130852	0	4007	217455	244	0	0	0	11748	0	8135	0	0	3780	0	5719	189441	0	2234	125	0	0	0	0	0	9	1155	9365	71	0	182290	159914	290724	0	47459	0	13003	0	0
Caribbean1997	16669	0	0	265	0	0	0	0	14493	0	133985	0	3577	212219	238	0	0	0	8400	0	8483	0	0	2797	0	5454	197833	0	2233	115	0	0	0	0	0	9	962	8135	70	0	183558	152488	318922	0	50406	0	14045	0	0
Caribbean1998	16253	0	0	285	0	0	0	0	16237	0	132800	0	3228	187488	241	0	0	0	7783	0	8102	0	0	3212	0	5448	199279	0	2331	110	0	0	0	0	0	9	869	8667	75	0	190272	134580	301179	0	53430	0	15443	0	0
Caribbean1999	15841	0	0	285	0	0	0	0	16958	0	134014	0	2945	174439	284	0	0	0	7908	0	10947	0	0	3226	0	5500	184906	0	2200	128	0	0	0	0	0	289	780	7261	75	0	144792	136182	308019	0	55417	0	14733	0	0
Caribbean2000	15431	0	0	295	0	0	0	0	15932	0	142802	0	2714	198037	255	0	0	0	8152	0	9762	0	0	2638	0	5518	184372	0	2200	120	0	0	0	0	0	294	591	9560	76	0	178092	129260	291869	0	51567	0	22145	0	0
Caribbean2001	15022	0	0	345	0	0	0	0	18564	0	134970	0	2525	194765	253	0	0	0	8294	0	9674	0	0	2964	0	5539	194028	0	2100	217	0	0	0	0	0	299	610	10663	77	0	151087	122261	284961	0	50377	0	25824	0	0
Caribbean2002	14613	0	0	340	0	0	0	0	14494	0	132722	0	2370	195056	271	0	0	0	8385	0	10032	0	0	2651	0	5561	157370	0	2300	169	0	0	0	0	0	309	551	16371	78	0	162788	138675	273019	0	47909	0	28450	0	0
Caribbean2003	14131	0	0	365	0	0	0	0	17517	0	147590	0	2241	198052	239	0	0	0	8411	0	10832	0	0	2933	0	5800	195289	0	2350	171	0	0	0	0	0	313	658	18435	75	0	158627	134532	279205	0	45371	0	33344	0	0
Caribbean2004	13650	0	0	380	0	0	0	0	17860	0	146633	0	2128	195437	203	0	0	0	8460	0	13704	0	0	2464	0	5955	215087	0	2400	150	0	0	0	0	0	314	569	14995	79	0	160702	136287	270003	0	40325	0	38325	0	0
Caribbean2005	13168	0	0	321	0	0	0	0	16241	0	118703	0	2035	189261	222	0	0	0	8404	0	15663	0	0	2792	0	6015	231494	0	2323	169	0	0	0	0	0	307	614	13345	80	0	181639	136105	270262	0	42318	0	27988	0	0
Caribbean2006	12685	0	0	390	0	0	0	0	18657	0	123486	0	1955	173520	199	0	0	0	8523	0	13851	0	0	2688	0	6074	190498	0	2315	165	0	0	0	0	0	306	826	14047	82	0	189582	139721	267631	0	40355	0	20497	0	0
Caribbean2007	12200	0	0	420	0	0	0	0	18838	0	127682	0	1886	225884	178	0	0	0	8628	0	14049	0	0	2383	0	5900	178896	0	2900	147	0	0	0	0	0	309	759	14945	80	0	187677	154211	304003	0	43378	0	20772	0	0
Caribbean2008	11713	0	0	450	0	0	0	0	15774	0	119602	0	1878	225279	163	0	0	0	8961	0	15438	0	0	2741	0	6900	167902	0	2827	182	0	0	0	0	0	313	626	15468	83	0	189675	150136	253930	0	43517	0	19805	0	0
Caribbean2009	11226	0	0	465	0	0	0	0	19140	0	133465	0	1855	303541	154	0	0	0	9353	0	13047	0	0	3081	0	7400	184837	0	2697	205	0	0	0	0	1	310	976	16028	84	0	187332	122887	268771	0	43065	0	14533	0	0
Caribbean2010	10628	0	0	299	0	0	0	0	23667	0	140357	0	1830	291919	153	0	0	0	10585	0	12253	0	0	3095	0	6230	226212	0	2576	114	0	0	0	0	1	309	1050	14371	84	0	196864	123405	265821	0	42889	0	12354	0	0
Caribbean2011	10213	0	0	351	0	0	0	0	25340	0	161996	0	1805	308702	155	0	0	0	10202	0	14064	0	0	4936	0	5176	209173	0	2605	140	0	0	0	0	2	309	1020	14281	85	0	189482	128512	267083	0	42667	0	12756	0	0
Caribbean2012	8600	0	0	337	0	0	0	0	27896	0	136864	0	1800	319474	147	0	0	0	10709	0	12494	0	0	5115	0	7500	162639	0	2623	123	0	0	0	0	3	309	1019	15038	100	0	190531	125464	209583	0	42394	0	12659	0	0
Caribbean2013	8600	0	0	334	0	0	0	0	30723	0	135294	0	1850	334082	157	0	0	0	10215	0	13273	0	0	5758	0	7500	192318	0	2641	284	0	0	0	0	3	309	873	17472	88	0	194506	129133	244617	0	42421	0	15756	0	0
Caribbean2014	8500	0	0	306	0	0	0	0	32321	0	148085	0	1800	326736	160	0	0	0	9825	0	12745	0	0	3954	0	7082	231936	0	2660	192	0	0	0	0	3	310	867	14239	82	0	198361	127555	180799	0	41949	0	14978	0	0
[truncated: 108 more columns]

## Sheet: Central America
	Agavefibresnes	Almondswithshell	Anisebadianfennelcoriander	Apples	Apricots	Arecanuts	Artichokes	Asparagus	Avocados	Bambarabeans	Bananas	Barley	Bastfibresother	Beansdry	Beansgreen	Berriesnes	Blueberries	Brazilnutswithshell	Broadbeanshorsebeansdry	Buckwheat	Cabbagesandotherbrassicas	Canaryseed	Carobs	Carrotsandturnips	Cashewapple	Cashewnutswithshell	Cassava	Cassavaleaves	Castoroilseed	Cauliflowersandbroccoli	Cerealsnes	Cherries	Cherriessour	Chestnut	Chickpeas	Chicoryroots	Chilliesandpeppersdry	Chilliesandpeppersgreen	Cinnamoncanella	Cloves	Cocoabeans	Coconuts	Coffeegreen	Coir	Cowpeasdry	Cranberries	Cucumbersandgherkins	Currants	Dates
CentralAmerica1961	6000	0	25	8379	416	0	0	1300	13820	0	143845	233133	1500	1883816	6923	0	0	0	50065	0	6580	3088	0	1220	1750	0	14549	0	11121	500	0	0	0	0	156480	0	23443	34802	0	0	107383	84311	917138	0	0	0	5778	0	811
CentralAmerica1962	6000	0	30	9114	401	0	0	1300	14416	0	146428	192680	1600	1959855	6282	0	0	0	55837	0	6800	3168	0	1340	1750	0	14820	0	12460	510	0	0	0	0	146083	0	22374	38109	0	0	107975	85431	933637	0	0	0	5878	0	882
CentralAmerica1963	6700	0	30	10925	446	0	0	1350	15718	0	157299	232463	1900	2016469	6411	0	0	0	65166	0	6946	3137	0	1460	1800	0	15207	0	12470	520	0	0	0	0	104814	0	24045	40854	0	0	108603	85508	958982	0	0	0	5989	0	636
CentralAmerica1964	6100	0	15	11181	463	0	0	1350	16029	0	165865	211754	1200	2410933	6536	0	0	0	64684	0	7430	3222	0	1460	1800	0	15752	0	12254	530	0	0	0	0	136943	0	25179	42257	0	0	108671	85192	996591	0	0	0	6089	0	710
CentralAmerica1965	6100	0	15	12248	483	0	0	1350	18469	0	164677	226335	1900	2417582	6632	0	0	0	65331	0	7604	3275	0	1570	1850	0	16425	0	9592	540	0	0	0	0	155158	0	23496	42501	0	0	109748	89431	1000704	0	0	0	6199	0	725
CentralAmerica1966	6200	0	20	12501	495	0	0	1400	20176	0	172760	240810	3250	2543853	6823	0	0	0	63203	0	7956	3420	0	1570	1850	0	16641	0	9534	550	0	0	0	0	163324	0	24384	43272	0	0	109791	91422	1023025	0	0	0	6200	0	735
CentralAmerica1967	6200	0	25	11946	511	0	0	1400	21881	0	172191	238526	3100	2237769	7508	0	0	0	60732	0	8389	6116	0	1710	1900	0	17583	0	9059	600	0	0	0	0	192802	0	20586	38611	0	0	109503	92033	1066936	0	0	0	6710	0	749
CentralAmerica1968	6300	0	25	12850	526	0	0	1400	23210	0	189566	251919	2900	2110385	7681	0	0	0	57533	0	8402	6722	0	1875	1950	0	18682	0	9432	600	0	0	0	0	202192	0	21382	39199	0	0	112293	95664	1034733	0	0	0	7212	0	750
CentralAmerica1969	6351	0	25	16171	565	0	0	1450	24504	0	189611	245065	2500	1968635	7679	0	0	0	68197	0	9080	10051	0	2005	2000	0	19161	0	9723	700	0	0	0	0	206164	0	19672	36438	0	0	113635	105707	956651	0	0	0	7722	0	120
CentralAmerica1970	6420	0	35	16532	810	0	0	1500	26749	0	202701	224161	1759	2117405	7564	0	0	0	67735	0	9064	14895	0	1970	0	2050	19988	0	9366	800	0	0	0	0	208294	0	18768	37031	0	0	115835	121091	973939	0	0	0	8222	0	220
CentralAmerica1971	7075	0	50	23010	899	0	0	1518	31704	0	213560	221319	3528	2354217	8613	0	0	0	78905	0	9548	5865	0	2071	0	2100	20444	0	9679	1000	0	0	0	0	214806	0	18113	45739	0	0	118548	134362	1049729	0	0	0	13424	0	452
CentralAmerica1972	7945	0	60	30760	994	0	0	3000	34964	0	210082	217536	3600	2007449	10251	0	0	0	81347	0	9580	7080	0	2385	0	2150	20591	0	10758	1000	0	0	0	0	247440	0	24949	61447	0	0	106665	138319	1069666	0	0	0	17767	0	465
CentralAmerica1973	8970	0	75	34412	1088	0	0	4500	39824	0	188995	262611	3600	2176372	10474	0	0	0	75636	0	9650	7544	0	2660	0	2200	21362	0	10871	1100	0	0	0	0	216193	0	27466	57587	0	0	113166	140974	1070364	0	0	0	11768	0	465
CentralAmerica1974	10137	0	85	35853	1118	0	0	6000	42155	0	185259	173553	3100	1871010	9436	0	0	0	62564	0	9899	5283	0	3330	0	2250	21990	0	10798	1400	0	0	0	0	248097	0	26932	56385	0	0	112488	147504	1071899	0	0	0	10437	0	484
CentralAmerica1975	10394	0	95	33067	1163	0	0	7360	46253	0	196721	286674	3100	2149900	8617	0	0	0	63241	0	9729	7656	0	3350	0	2050	22408	0	11081	1600	0	0	0	0	190634	0	26226	40806	0	0	101861	151599	1078981	0	0	0	10882	0	527
CentralAmerica1976	13006	0	110	35350	1012	0	0	9226	46042	0	201921	363738	1738	1690569	9116	0	0	0	72745	0	11030	8747	0	3654	0	2050	23408	0	11196	2333	0	0	0	0	105995	0	25800	40869	0	0	101687	165104	1078096	0	0	0	13175	0	425
CentralAmerica1977	13423	0	139	41120	1089	0	0	10386	54843	0	191467	248661	690	1948951	13258	0	0	0	77096	0	11314	12981	0	3999	0	2100	24529	0	11053	3202	0	0	0	0	252328	0	35513	50420	0	0	101229	165515	1103431	0	0	0	7254	0	427
CentralAmerica1978	13550	0	140	44106	1058	0	0	4273	61250	0	186440	296711	580	1920041	10435	0	0	0	67022	0	11721	18095	0	3987	0	2590	21784	0	8960	875	0	0	0	0	198152	0	36896	56507	0	0	112331	167347	1114001	0	0	0	8305	0	512
CentralAmerica1979	14123	0	150	44681	674	0	0	4002	58561	0	168868	250625	950	1338268	7350	0	0	0	52391	0	12938	7077	0	4696	0	2800	21358	0	8757	1765	0	0	0	0	303146	0	28751	58485	0	0	108673	163624	1155126	0	0	0	12767	0	471
CentralAmerica1980	13226	419	1284	45970	1286	0	16	4174	64798	0	187462	319655	910	1825080	8337	0	0	0	60446	0	12899	4039	48	3167	0	3077	17681	0	4533	1248	0	53	0	0	134659	0	20731	61252	0	0	96469	158297	1220691	0	0	0	11819	0	517
CentralAmerica1981	14023	424	1073	56545	1339	0	4	4573	66240	0	192058	271627	850	2311981	6066	0	0	0	48800	0	14352	4958	70	2907	0	3077	20462	0	2284	1200	0	54	0	0	147973	0	24250	45686	0	0	95433	160848	1263500	0	0	0	10705	0	470
CentralAmerica1982	18203	430	1718	46320	1538	0	17	4287	66296	0	189442	229711	640	1878533	5852	0	0	0	61741	0	14583	6167	70	5253	0	2800	20842	0	3038	2020	435	54	0	0	153566	0	32847	62510	0	0	89716	181533	1305655	0	0	0	10618	0	332
CentralAmerica1983	19486	413	1476	47949	1324	0	1	3106	68160	0	175371	303881	850	2306493	6209	0	0	0	48395	0	14079	10008	70	4797	0	2863	20995	0	7200	2641	10	18	0	0	135070	0	14410	48392	0	0	79038	192222	1335212	0	0	0	13555	0	489
CentralAmerica1984	15483	22	1620	55183	761	0	0	5320	67719	0	168621	283571	557	2048716	7412	0	0	0	55915	0	15897	11329	70	6552	0	2800	22189	0	2468	3828	60	45	0	0	134539	0	27844	51580	0	0	95412	175616	1242158	0	0	0	17530	0	481
CentralAmerica1985	13971	54	2349	53673	623	0	9	5124	84655	0	164424	281009	600	2202371	4288	35	0	0	55906	0	15115	6664	50	4613	0	3198	21370	0	2461	6239	601	42	0	0	134218	0	19021	80009	0	0	96619	185479	1229402	0	0	0	14851	0	441
CentralAmerica1986	16371	370	2765	55502	438	0	23	5858	78142	0	166790	266985	696	2284036	6606	50	0	0	46263	0	16352	6637	0	7245	0	3829	21106	0	2435	6713	415	20	0	0	133341	0	27658	67614	0	0	98297	197778	1371105	0	0	0	13882	0	536
CentralAmerica1987	18838	21	3369	52694	411	0	84	6048	72901	0	175234	286725	735	2221488	7271	100	0	0	41634	0	16726	9489	0	6656	0	3919	20959	0	2450	16695	795	20	0	0	197482	0	31033	66953	0	0	97143	213512	1319352	0	0	0	14123	0	511
CentralAmerica1988	18842	146	3569	62456	436	0	85	5129	89074	0	176750	247714	740	2405823	8706	100	0	0	42406	0	18591	10264	70	8174	0	4280	21660	0	2460	16599	613	20	0	0	79114	0	42581	74170	0	0	106282	235864	1408648	0	0	0	18181	0	610
CentralAmerica1989	24844	54	2934	60125	298	0	67	6267	68621	0	172459	264202	1270	1747061	10832	100	0	0	37811	0	18263	10694	70	8052	0	4215	21792	0	814	17959	892	19	0	0	121490	0	47239	76023	0	0	102002	196225	1403111	0	0	0	16601	0	606
CentralAmerica1990	26395	59	3394	60505	328	0	76	9980	89335	0	174049	263628	1800	2570609	6842	92	0	0	36757	0	18657	8635	70	8604	0	3911	23781	0	850	21602	803	3	0	0	134565	0	30499	68003	0	0	109941	195945	1357810	0	0	0	16967	0	586
CentralAmerica1991	26605	74	3295	60855	394	0	100	9166	95093	0	166974	284866	2320	2515070	7922	72	0	0	40809	0	18778	2821	70	9186	0	3975	23206	0	1016	21812	653	20	0	0	121678	0	23435	76364	0	0	103041	206824	1447483	0	0	0	16415	0	516
CentralAmerica1992	21896	43	3082	63203	589	0	177	9978	99854	0	173489	290774	3330	1766356	8253	240	0	0	40524	0	19594	1291	70	9977	0	4630	22461	0	1014	21990	488	0	0	0	84764	0	62359	98899	0	0	108011	209490	1469690	0	0	0	16560	0	580
CentralAmerica1993	26787	125	3181	69317	544	0	38	10103	94771	0	193771	235056	4340	2342703	5903	280	25	0	28350	0	19081	1254	70	10770	0	5136	20382	0	950	21529	626	0	0	0	125063	0	46909	105580	0	0	108063	204114	1480849	0	0	0	17038	0	576
CentralAmerica1994	29184	89	3053	64377	606	0	156	9630	101931	0	195190	116815	5340	2599280	8547	585	200	0	29866	0	19567	615	70	8876	0	5396	21858	0	1032	18532	784	29	0	0	88804	0	31267	85137	0	0	109314	205245	1570212	0	0	0	15940	0	480
CentralAmerica1995	13889	73	3846	64245	582	0	227	9597	102065	0	191859	247397	5944	2501004	10878	601	200	0	39699	0	19040	1523	70	9872	0	8130	24028	0	1895	18033	812	40	0	0	109253	0	37201	77629	0	0	119865	196647	1554585	0	0	0	16390	0	535
CentralAmerica1996	18661	63	4693	63074	495	0	219	9444	102566	0	186201	284391	6865	2488711	9097	748	200	0	28943	0	19453	1338	70	11133	0	8963	20924	0	1895	20928	1372	50	0	0	171395	0	29599	84303	0	0	119740	202328	1601275	0	0	0	20240	0	636
CentralAmerica1997	17909	64	4312	65481	488	0	529	11519	94215	0	182203	244946	6454	2096786	9804	800	200	0	25110	0	20708	852	70	14503	0	6706	20174	0	3327	20457	2844	70	0	0	146257	0	47520	101308	0	0	106002	195826	1543945	0	0	0	20224	0	610
CentralAmerica1998	18338	61	4371	61715	375	0	450	13095	104958	0	182228	269387	6380	2675045	8444	973	115	0	26200	0	20937	485	70	16126	0	7054	22521	0	1500	23170	1791	50	0	0	68061	0	34000	158021	0	0	104605	193676	1523589	0	0	0	19150	0	890
CentralAmerica1999	17880	61	4434	67519	402	0	550	12765	105585	0	186799	228906	4080	2276916	8367	1096	110	0	33096	0	23434	342	70	18850	0	7410	30628	0	1400	29483	3210	71	0	0	137142	0	35588	165614	0	0	106828	203205	1593154	0	0	0	20797	0	617
CentralAmerica2000	18716	61	4493	57698	396	0	260	13428	106978	0	177242	292080	4090	2100214	10019	1203	60	0	41062	0	21940	298	70	19235	0	6448	27374	0	1800	28798	3119	71	0	0	134909	0	35661	147671	0	0	100395	199551	1582755	0	0	0	19876	0	894
CentralAmerica2001	18494	38	4546	64049	412	0	350	14602	105927	0	174765	312462	4200	2260291	10711	1040	60	0	39315	0	23967	164	70	17911	0	7146	28402	0	1900	25475	3259	1	0	0	194464	0	35609	149231	0	0	100970	190873	1654716	0	0	0	21797	0	926
CentralAmerica2002	19340	38	4594	63948	440	0	465	14548	105967	0	160540	283816	3952	2697322	12048	1092	60	0	42683	0	21503	446	10	18261	0	6920	31771	0	1500	23261	2519	0	0	0	147337	0	35600	142773	0	0	98430	185419	1588950	0	0	0	20565	0	759
CentralAmerica2003	19485	38	5830	57705	390	0	551	14265	109661	0	167013	365750	3793	2551998	10873	2051	60	0	39582	0	20835	643	0	16108	0	6256	30601	0	947	29276	1435	0	0	0	114401	0	35000	143418	0	0	96561	170819	1639425	0	0	0	22077	0	550
CentralAmerica2004	19718	40	6088	62230	327	0	386	13546	114475	0	175742	327100	3530	2270122	11744	2190	60	0	34459	0	20132	545	0	18444	0	6571	33340	0	718	31393	2058	0	0	0	73929	0	35500	85218	0	0	97388	203752	1647155	0	0	0	23013	0	565
CentralAmerica2005	20066	38	7442	63026	284	0	410	13921	117723	0	198941	307290	3520	1903603	11458	2704	60	0	35066	0	21313	393	10	17385	0	6767	44525	0	1000	29443	2004	0	0	0	97751	0	36000	95293	0	0	76478	189334	1663943	0	0	0	21489	0	600
CentralAmerica2006	19911	34	7783	61663	348	0	258	14287	122449	0	195137	316432	3350	2393647	11436	3097	56	0	36394	0	21366	300	70	18970	0	6703	42113	0	500	26707	2133	0	0	0	113262	0	36200	96646	0	0	81392	184999	1658003	0	0	0	20671	0	625
CentralAmerica2007	20025	32	7522	60203	310	0	305	13927	127478	0	215264	287303	2762	2132095	11249	3287	14	0	42251	0	21613	187	56	18833	0	7212	38127	0	5	29262	2056	0	0	0	89665	0	37000	92151	0	0	79563	192468	1669480	0	0	0	19874	0	596
CentralAmerica2008	20294	31	6519	60207	307	0	209	15828	129845	0	217026	311840	2199	2190813	11753	6515	62	0	41779	0	21613	173	56	18681	0	6300	37769	0	6	31536	3014	0	0	0	90970	0	35191	136802	0	0	99852	199861	1656809	0	0	0	28843	0	634
CentralAmerica2009	20616	31	6057	63686	311	0	142	17028	139101	0	212376	240146	2128	1924273	10811	6715	190	0	39116	0	21723	179	0	17979	0	5842	40045	0	5	34177	2977	0	0	0	78385	0	34593	144424	0	0	117992	199902	1659462	0	0	0	20876	0	653
CentralAmerica2010	20996	30	6903	65235	331	0	139	16363	142258	0	217555	268768	2189	2318653	10944	6442	106	0	41362	0	23042	184	76	18459	0	5547	32593	0	7	31617	3151	12	0	0	89196	0	34139	147924	0	0	111017	199677	1697702	0	0	0	21279	0	662
CentralAmerica2011	21426	30	7063	66449	247	0	248	16781	144333	0	218093	219463	2219	1677549	9515	10774	636	0	36033	0	23615	169	76	19436	0	5206	35934	0	5	34699	2864	0	0	0	48067	0	33720	148351	0	0	103086	199114	1652700	0	0	0	19801	0	988
CentralAmerica2012	21740	30	7013	69546	300	0	303	16263	148226	0	216983	329291	2256	2366524	12656	11482	885	0	43968	0	23936	164	30	17296	0	4948	66178	0	51	32463	3292	12	0	0	133492	0	32500	140414	0	0	98428	195030	1672935	0	0	0	18222	0	946
CentralAmerica2013	21780	30	7629	71751	178	0	177	17860	162605	0	221196	298012	2276	2573538	11760	11940	1290	0	46086	0	23288	166	0	17407	0	4600	60898	0	0	38549	3729	15	0	0	115551	0	32500	137134	0	0	93655	194019	1596045	0	0	0	18383	0	1008
CentralAmerica2014	22580	29	6647	69523	181	0	239	20471	172522	0	224971	314634	2297	2460834	12839	12528	1803	0	47504	0	22328	55	0	17209	0	3701	54780	0	0	40490	5014	45	0	0	106434	0	33052	147781	0	0	84182	195676	1608569	0	0	0	19821	0	1169
[truncated: 108 more columns]

## Sheet: Central Asia
	Agavefibresnes	Almondswithshell	Anisebadianfennelcoriander	Apples	Apricots	Arecanuts	Artichokes	Asparagus	Avocados	Bambarabeans	Bananas	Barley	Bastfibresother	Beansdry	Beansgreen	Berriesnes	Blueberries	Brazilnutswithshell	Broadbeanshorsebeansdry	Buckwheat	Cabbagesandotherbrassicas	Canaryseed	Carobs	Carrotsandturnips	Cashewapple	Cashewnutswithshell	Cassava	Cassavaleaves	Castoroilseed	Cauliflowersandbroccoli	Cerealsnes	Cherries	Cherriessour	Chestnut	Chickpeas	Chicoryroots	Chilliesandpeppersdry	Chilliesandpeppersgreen	Cinnamoncanella	Cloves	Cocoabeans	Coconuts	Coffeegreen	Coir	Cowpeasdry	Cranberries	Cucumbersandgherkins	Currants	Dates
CentralAsia1992	0	11400	0	186400	35100	0	100	0	0	0	0	6310429	0	17115	1440	760	100	0	11000	573690	33500	0	0	18700	0	0	0	0	0	100	85000	10200	1000	0	10000	100	1750	2450	0	0	0	0	0	0	0	0	35300	325	0
CentralAsia1993	0	11555	0	185350	33500	0	93	0	0	0	0	7547500	0	22073	1373	750	100	0	8000	418239	25900	0	0	17600	0	0	0	0	0	100	57000	9079	992	0	10000	100	1637	2374	0	0	0	0	0	0	0	0	28900	341	0
CentralAsia1994	0	11912	0	185300	33800	0	95	0	0	0	0	6329900	0	30699	1391	755	100	0	8000	342000	28500	0	0	19000	0	0	0	0	0	100	8000	9501	987	0	15000	100	1677	2396	0	0	0	0	0	0	0	0	29600	307	0
CentralAsia1995	0	12612	0	188500	30000	0	92	0	0	0	0	4534600	0	17095	1369	720	100	0	8000	206100	31400	0	0	19800	0	0	0	0	0	100	71600	10015	1016	0	2200	100	1716	2400	0	0	0	0	0	0	0	0	33800	271	0
CentralAsia1996	0	12897	0	184100	29300	0	100	0	0	0	0	3629100	0	10312	1366	800	100	0	9000	198100	31000	0	0	18700	0	0	0	0	0	100	55000	10300	932	0	1400	100	1848	2337	0	0	0	0	0	0	0	0	32400	269	0
CentralAsia1997	0	11871	0	174900	29000	0	90	0	0	0	0	3173610	0	11069	1360	850	100	0	10000	82850	31690	0	0	20210	0	0	0	0	0	100	30200	11400	1016	0	900	100	1815	2313	0	0	0	0	0	0	0	0	31749	243	0
CentralAsia1998	0	13369	0	174400	23300	0	100	0	0	0	0	2080100	0	27755	2227	800	100	0	7183	48052	29764	0	0	30137	0	0	0	0	0	100	20900	8950	1000	0	1000	100	2039	2974	0	0	0	0	0	0	0	0	33400	325	0
CentralAsia1999	0	13503	0	171900	24200	0	100	0	0	0	0	1943112	0	16221	2570	850	100	0	3800	35693	29560	0	0	32267	0	0	0	0	0	100	64600	8700	1000	0	1400	100	1888	2600	0	0	0	0	0	0	0	0	36400	120	0
CentralAsia2000	0	12483	0	170692	36500	0	110	0	0	0	0	1836366	0	20214	2523	860	100	0	2400	47877	31296	0	0	34311	0	0	0	0	0	110	25300	10400	1020	0	1500	100	1947	3450	0	0	0	0	0	0	0	0	32600	120	0
CentralAsia2001	0	13506	0	159210	37500	0	120	0	0	0	0	1916780	0	25770	1840	965	100	0	3100	57236	31935	0	0	35992	0	0	0	0	0	120	31500	9730	1222	0	2300	100	2064	3410	0	0	0	0	0	0	0	0	31800	120	0
CentralAsia2002	0	13300	0	154453	43761	0	110	0	0	0	0	2009635	0	25214	2294	988	100	0	4500	42196	30538	0	0	34322	0	0	0	0	0	150	31100	10697	2022	0	1500	100	1970	4217	0	0	0	0	0	0	0	0	27253	123	0
CentralAsia2003	0	12496	0	154292	40104	0	110	0	0	0	0	2173434	0	24026	2382	972	100	0	3100	63135	31995	0	0	38866	0	0	0	0	0	120	32700	10139	1822	0	1600	100	1958	4543	0	0	0	0	0	0	0	0	29370	125	0
CentralAsia2004	0	12556	0	158361	45212	0	130	0	0	0	0	1931268	0	21457	3914	971	100	0	3000	53626	32273	0	0	39097	0	0	0	0	0	170	30900	8269	2040	0	2600	100	2006	5144	0	0	0	0	0	0	0	0	31888	130	0
CentralAsia2005	0	13204	0	161400	43900	0	130	0	0	0	0	1732390	0	25792	2925	970	100	0	3000	77578	34476	0	0	41785	0	0	0	0	0	120	40000	10200	2444	0	3800	100	1976	5200	0	0	0	0	0	0	0	0	32498	130	0
CentralAsia2006	0	13680	0	152263	54273	0	140	0	0	0	0	1934341	0	36294	3000	969	100	0	2400	87803	33759	0	0	45665	0	0	0	0	0	120	39200	11114	3118	0	6800	100	1888	5000	0	0	0	0	0	0	0	0	31546	150	0
CentralAsia2007	0	12880	0	160200	57400	0	145	0	0	0	0	2117499	0	42596	3010	963	91	0	2000	138263	35091	0	0	47540	0	0	0	0	0	130	46300	11200	3230	0	5961	100	1913	5050	0	0	0	0	0	0	0	0	31293	180	0
CentralAsia2008	0	13232	0	153200	56100	0	170	0	0	0	0	2334829	0	41676	3300	967	100	0	2500	54018	35178	0	0	45308	0	0	0	0	0	150	53397	11700	3023	0	12700	100	1972	7200	0	0	0	0	0	0	0	0	31367	130	0
CentralAsia2009	0	13279	0	154000	56700	0	120	0	0	0	0	2023792	0	43112	4300	980	100	0	2500	57461	35170	0	0	44379	0	0	0	0	0	240	105160	14400	3240	0	16800	100	2010	7000	0	0	0	0	0	0	0	0	29613	130	0
CentralAsia2010	0	13304	0	164298	58771	0	120	0	0	0	0	1652877	0	26417	4200	960	100	0	2600	63874	39094	0	0	48530	0	0	0	0	0	345	121000	13000	3340	0	25600	100	2487	7900	0	0	0	0	0	0	0	0	34652	130	0
CentralAsia2011	0	12822	0	175529	63423	0	120	0	0	0	0	1817817	0	47494	3200	1010	110	0	1400	66842	45740	0	0	59142	0	0	0	0	0	250	222400	12075	3517	0	27400	100	2205	8000	0	0	0	0	0	0	0	0	40896	140	0
CentralAsia2012	0	13655	0	188582	63190	0	143	0	0	0	0	1966010	0	51652	3500	1120	121	0	2000	76243	41756	0	0	62996	0	0	0	0	0	250	235960	14595	3949	0	36000	100	2190	8853	0	0	0	0	0	0	0	0	44492	149	0
CentralAsia2013	0	13811	0	195334	67608	0	151	0	0	0	0	2174673	0	64323	3600	1031	135	0	2500	81494	47197	0	0	64107	0	0	0	0	0	350	204008	14924	4034	0	34300	100	2203	9583	0	0	0	0	0	0	0	0	44022	152	0
CentralAsia2014	0	14800	0	204358	70802	0	154	0	0	0	0	2252904	0	54342	4100	1050	141	0	2700	64504	49167	0	0	64539	0	0	0	0	0	365	184000	16052	4470	0	46900	100	2190	10274	0	0	0	0	0	0	0	0	46369	170	0
[truncated: 108 more columns]

## Sheet: Eastern Africa
	Agavefibresnes	Almondswithshell	Anisebadianfennelcoriander	Apples	Apricots	Arecanuts	Artichokes	Asparagus	Avocados	Bambarabeans	Bananas	Barley	Bastfibresother	Beansdry	Beansgreen	Berriesnes	Blueberries	Brazilnutswithshell	Broadbeanshorsebeansdry	Buckwheat	Cabbagesandotherbrassicas	Canaryseed	Carobs	Carrotsandturnips	Cashewapple	Cashewnutswithshell	Cassava	Cassavaleaves	Castoroilseed	Cauliflowersandbroccoli	Cerealsnes	Cherries	Cherriessour	Chestnut	Chickpeas	Chicoryroots	Chilliesandpeppersdry	Chilliesandpeppersgreen	Cinnamoncanella	Cloves	Cocoabeans	Coconuts	Coffeegreen	Coir	Cowpeasdry	Cranberries	Cucumbersandgherkins	Currants	Dates
EasternAfrica1961	0	0	0	7050	42	0	0	0	1100	0	368436	948584	3000	1031050	2195	0	0	0	230000	0	2510	0	0	520	283000	18000	1983619	0	61100	130	1980000	0	0	0	188000	0	223500	80	7060	60000	3800	322200	977742	0	158505	0	167	0	1450
EasternAfrica1962	0	0	0	7070	42	0	0	0	1100	0	370552	965048	3000	1033238	2347	0	0	0	230000	0	2815	0	0	527	318000	18000	1946871	0	69700	140	2133000	0	0	0	194000	0	228700	100	8060	53000	3885	323600	1207190	0	165939	0	225	0	1500
EasternAfrica1963	0	0	0	7100	52	0	0	0	1100	0	374505	981024	3000	1047099	2410	0	0	0	240000	0	2830	0	0	526	340000	19000	2001648	0	74100	126	2100000	0	0	0	201000	0	233900	100	6100	63000	3910	333400	1222905	0	174084	0	230	0	1500
EasternAfrica1964	0	0	0	7900	52	0	0	0	1100	0	377619	982507	4245	1092232	2508	0	0	0	250000	0	2957	0	0	521	366000	19000	1936764	0	66540	136	2108000	0	0	0	200000	0	235200	100	7300	58245	4056	345600	1263561	0	156681	0	170	0	1500
EasternAfrica1965	0	0	0	7930	62	0	0	0	1100	0	390995	992272	6160	1067779	2791	0	0	0	250000	0	3091	0	0	536	359000	19000	2074961	0	77310	131	2110000	0	0	0	195239	0	239000	107	8400	61540	4235	339100	1319271	0	147836	0	213	0	1600
EasternAfrica1966	0	0	0	9550	62	0	0	0	1100	0	401265	1000255	7000	1147081	2960	0	0	0	260000	0	3113	0	0	550	348000	19000	1954019	0	79285	117	2111600	0	0	0	204000	0	242700	97	10550	68650	4595	339400	1388188	0	152000	0	217	0	1600
EasternAfrica1967	0	0	0	9600	62	0	0	0	1100	0	400890	962264	6065	1245685	3123	0	0	0	265000	0	3202	0	0	532	364000	19000	2053962	0	75460	142	2132700	0	0	0	212000	0	244400	135	15550	71405	4761	354100	1381502	0	156000	0	200	0	1600
EasternAfrica1968	0	0	1570	3380	62	0	0	0	1100	0	417183	941604	7035	1283936	2444	0	0	0	275000	0	3203	0	0	535	497200	20000	2071454	0	76325	130	2154000	0	0	0	271900	0	247900	185	18100	63730	5380	353500	1274678	0	172000	0	168	0	1650
EasternAfrica1969	0	0	570	3380	52	0	0	0	1150	0	430171	950560	10405	1268601	1879	0	0	0	275000	0	3415	0	0	526	463200	20000	2205819	0	67250	121	2175500	0	0	0	270400	0	251500	212	9850	49065	5612	371900	1325711	0	188980	0	156	0	1650
EasternAfrica1970	0	0	800	3380	42	0	0	0	1200	0	510143	961850	9480	1408010	1264	0	0	0	280000	0	3299	0	0	536	20000	554200	2428288	0	67700	120	2197300	0	0	0	276170	0	255000	133	8350	46830	5910	372500	1298631	0	154500	0	154	0	1650
EasternAfrica1971	0	0	280	5250	37	0	0	0	1260	0	464340	971100	8545	1642819	1369	0	0	0	285000	0	3560	0	0	542	20000	590500	2386503	0	66425	105	2217800	0	0	0	284000	0	258200	147	7708	64165	6305	373700	1301098	0	131500	0	164	0	1650
EasternAfrica1972	0	0	480	5300	52	0	0	0	1600	0	478370	965200	6640	1487350	1506	0	0	0	295000	0	3797	0	0	631	20000	565500	2304662	0	56350	108	2239500	0	0	0	304000	0	261600	96	11863	76330	6210	386000	1254039	0	160300	0	164	0	1650
EasternAfrica1973	0	0	970	3825	52	0	0	0	1745	0	455299	956300	9645	1640255	1254	0	0	0	300000	0	3871	0	0	652	20000	655500	2490415	0	47450	136	1665000	0	0	0	277000	0	263300	54	9742	81755	6060	386800	1331284	0	147350	0	155	0	1650
EasternAfrica1974	0	0	870	3395	52	0	0	0	2660	0	467132	968014	7585	1670201	1364	0	0	0	338851	0	4243	0	0	716	20000	596000	2585524	0	46100	215	1686000	0	0	0	243000	0	265700	56	8951	55940	6695	385508	1218447	0	172670	0	136	0	1650
EasternAfrica1975	0	0	570	3965	37	0	0	0	3070	0	467201	796530	7985	1747160	1429	0	0	0	329800	0	4601	0	0	750	21000	566000	2571351	0	44180	179	1217600	0	0	0	211200	0	265900	48	6487	80290	7170	388825	1233788	0	190815	0	341	0	1650
EasternAfrica1976	0	0	270	1930	42	0	0	0	3140	0	493230	583400	6395	1817462	1475	0	0	0	263600	0	4447	0	0	739	21000	419000	2337237	0	44250	91	1440400	0	0	0	230800	0	273200	60	6690	76990	7230	388400	1193583	0	248375	0	412	0	2150
EasternAfrica1977	0	0	600	2305	52	0	0	0	5435	0	484477	773000	6400	1837323	1513	0	0	0	270100	0	4674	0	0	765	21000	408300	2277145	0	40270	101	1337100	0	0	0	204300	0	271400	70	4820	91260	7310	389910	1224875	0	247556	0	260	0	2350
EasternAfrica1978	0	0	320	2905	82	0	0	0	6115	0	472347	860488	6550	1992944	1578	0	0	0	281800	0	4829	0	0	814	22000	316500	2337558	0	39420	110	1304000	0	0	0	192900	0	266500	76	3620	83965	9725	392700	1227186	0	248861	0	234	0	2050
EasternAfrica1979	0	0	420	2940	102	0	0	0	3205	0	507175	924346	6730	1858855	1764	0	0	0	295900	0	5547	0	0	838	22000	279500	2174664	0	39200	83	1392600	0	0	0	195600	0	266900	73	3320	104990	9625	405710	1205482	0	214757	0	205	0	2650
EasternAfrica1980	0	0	320	3785	107	0	0	0	3225	0	529955	957411	6730	1937923	1639	0	0	0	326550	0	5696	0	0	975	24000	254500	2199000	0	39900	86	1513540	0	0	0	228330	0	272200	70	3820	97015	9647	416750	1182938	0	212418	0	187	0	2650
EasternAfrica1981	0	0	320	3885	123	0	0	0	3240	0	479109	865229	6735	2032843	1710	0	0	0	306470	0	5472	0	0	1309	24000	278600	2188225	0	39900	96	1364340	0	0	0	207080	0	277300	95	3020	97565	9645	427720	1245338	0	218339	0	171	0	2650
EasternAfrica1982	0	0	420	3945	126	0	0	0	3285	0	535770	847254	6756	2158390	1206	0	0	0	348910	0	5663	0	0	1097	24000	226000	2443181	0	40200	112	1331750	0	0	0	202590	0	277500	95	5175	87010	9913	426580	1221215	0	227399	0	212	0	2650
EasternAfrica1983	0	0	820	4010	127	0	0	0	3395	0	537892	934696	6850	2210580	1308	0	0	0	380570	0	5843	0	0	1186	25000	155000	2594949	0	40500	134	1400030	0	0	0	209960	0	282600	109	5575	100605	10265	428410	1140707	0	232450	0	230	0	2650
EasternAfrica1984	0	0	500	3990	137	0	0	0	3410	0	539077	810689	7415	2201675	1414	10	0	0	350350	0	5934	0	0	1285	25000	160000	2645484	0	41080	181	1318140	0	0	0	257420	0	287700	113	2380	106775	10315	429200	1105793	0	238286	0	263	0	2740
EasternAfrica1985	0	0	440	4300	147	0	0	0	3700	0	571593	845503	8038	2252932	1403	17	0	0	326800	0	5982	0	0	1325	25000	137900	2629704	0	41800	262	1345290	0	0	0	292410	0	287984	121	5650	90225	12035	430350	1113078	0	236571	0	292	0	2745
EasternAfrica1986	0	0	640	4310	114	0	0	0	3800	0	586627	946630	7392	2209413	1387	167	0	0	280190	0	6193	0	0	1318	25000	133500	2667891	0	43900	439	1296440	0	0	0	218977	0	287984	106	6450	118205	12376	439700	1134689	0	245957	0	276	0	2745
EasternAfrica1987	0	0	790	4357	117	0	0	0	3930	0	603516	926434	8353	2307755	1331	167	0	0	262640	0	6376	0	0	1419	25000	133000	2568378	0	48300	476	1298530	0	0	0	234412	0	287965	116	3400	89865	12367	450737	1135692	0	241293	0	393	0	2745
EasternAfrica1988	0	0	640	4465	117	0	0	0	3930	0	626965	1086094	8310	2333254	1836	167	0	0	281990	0	6521	0	0	1448	25000	158300	2643987	0	50200	510	1253590	0	0	0	275056	0	288020	133	3300	111965	13267	462718	1141042	0	248629	0	370	0	2745
EasternAfrica1989	0	0	640	4575	123	0	0	0	4030	0	629056	991245	8310	2481675	1918	217	0	0	227250	0	6571	0	0	1492	25000	168900	2783094	0	54600	447	1461440	0	0	0	260370	0	288270	111	3400	100585	16467	474063	1174887	0	361034	0	496	0	2745
EasternAfrica1990	0	0	652	4703	137	0	7	60	4210	0	1051911	945140	9204	2395480	12120	288	0	0	218480	0	9302	0	0	1711	25869	110800	2742399	0	63745	545	1227085	0	0	0	318881	0	294482	245	2100	94427	20358	435935	1197805	0	377713	0	542	0	2945
EasternAfrica1991	0	0	713	4932	127	0	10	61	4454	0	1122277	756444	8320	2587519	9098	173	0	0	252208	0	26560	0	0	1743	24871	157600	2798240	0	64242	528	1279180	0	0	0	294588	0	296973	249	3800	117691	21077	495232	1167884	0	377486	0	577	0	2652
EasternAfrica1992	0	0	858	4823	128	0	5	74	4367	0	1189591	772133	6324	2578387	8362	185	0	0	297600	0	47472	0	0	6571	25118	183800	2798542	0	68696	995	1368450	0	0	0	250708	0	302487	1348	2600	94050	19680	497604	1180265	0	414871	0	592	0	2498
EasternAfrica1993	0	0	689	4973	133	0	15	59	5276	0	952398	655190	8330	2629707	8067	185	0	0	305290	0	47088	0	0	6831	25276	136000	2692807	0	72191	692	1409150	0	0	0	267507	0	305264	55815	2529	93329	18592	495087	1137148	0	406257	0	629	0	2729
EasternAfrica1994	0	0	765	4684	128	0	12	99	5445	0	816330	999958	7754	2531899	6913	198	0	0	333150	0	57525	0	0	7138	24674	132500	2802049	0	83675	729	1474460	0	0	0	276099	0	304277	59917	3644	101796	17073	497183	1047595	0	405345	0	740	0	2826
EasternAfrica1995	0	0	780	4799	135	0	9	96	4696	0	882337	1208272	8319	2891635	7222	168	0	0	348440	0	50885	0	0	6637	25168	145400	2682011	0	84273	669	1945714	0	0	0	334790	0	306322	58630	4300	88363	19972	512002	1123523	0	392477	0	782	0	2784
EasternAfrica1996	0	0	857	4872	140	0	26	75	5413	0	957854	1129546	9280	2869653	8458	198	0	0	346120	0	51007	0	0	7027	25552	186687	2763282	0	91440	742	2201283	0	0	0	377618	0	310083	56873	4300	103100	21158	524564	1156488	0	366109	0	799	0	2811
EasternAfrica1997	0	0	1175	4906	148	0	9	55	5706	0	1191920	983197	9685	2977681	10119	190	0	0	342010	0	53447	0	0	7132	26000	167400	2854991	0	91248	649	2274406	0	0	0	322205	0	317284	56497	4125	95461	22091	532793	1121184	0	378555	0	892	0	2764
EasternAfrica1998	0	0	1491	5008	144	0	17	70	8681	0	1350034	969729	9377	2971662	10830	206	0	0	425140	0	58825	0	0	6952	26007	191870	3018222	0	97219	555	1851680	0	0	0	383535	0	319054	56893	3922	99270	22345	494341	1104000	0	394028	0	1226	0	2674
EasternAfrica1999	0	0	1900	4964	160	0	15	95	8885	0	1288420	1115686	9475	3149280	9854	198	0	0	301510	400	64584	0	0	7622	26323	202905	2988120	0	101367	543	2199942	0	0	0	382745	0	318882	57852	3592	101820	23094	509984	1079409	0	415182	0	913	0	2661
EasternAfrica2000	0	0	1921	5159	153	0	15	82	19287	0	1277688	957848	8260	3264007	8842	176	0	0	365819	500	60762	0	0	7272	25916	255000	3144790	0	115738	770	2212442	0	0	0	405031	0	316607	58929	3663	106681	21465	538255	1131302	0	399717	0	935	0	2730
EasternAfrica2001	0	0	2267	5193	163	0	16	86	12894	0	1301606	1026844	8567	3663186	9209	197	0	0	436565	1000	60767	0	0	7194	26026	308626	2968497	0	131331	720	2261079	0	0	0	393145	0	316360	48832	3664	107128	22234	566146	1119854	0	428175	0	1014	0	2937
EasternAfrica2002	0	0	2622	5250	165	0	17	96	14524	0	1390319	902472	8663	3887828	9986	199	0	0	374922	1500	65670	0	0	7077	26108	339573	3060252	0	146613	574	1921461	0	0	0	364523	0	324579	59302	3974	104641	24664	548006	1184785	0	662893	0	1082	0	2911
EasternAfrica2003	0	0	3091	5331	167	0	52	69	17139	0	1437636	1149982	8761	3916485	8983	201	0	0	442461	2000	72503	0	0	7873	26190	379329	3281501	0	156947	670	2838038	0	0	0	317820	0	325274	51076	3240	105270	25451	574713	1071752	0	657310	0	1218	0	3094
EasternAfrica2004	0	0	2952	5345	168	0	37	93	20793	0	1346873	1338656	8861	3982617	9816	204	0	0	468596	2500	54617	0	0	7049	26279	397189	3446720	0	162228	645	2992306	0	0	0	362053	0	334525	55403	2745	106250	23963	604364	1340868	0	804547	0	1291	0	2937
EasternAfrica2005	0	0	4314	5489	172	0	31	94	24486	0	1348389	1293519	8260	4483737	10474	206	0	0	465077	4000	63169	0	0	7307	26431	329838	3430421	0	168115	627	3227982	0	0	0	396057	0	346795	63546	2575	57761	28932	670097	1123220	0	748982	0	1140	0	2855
EasternAfrica2006	0	0	3372	5444	171	0	34	97	27883	0	1527510	1088709	8660	4399710	9629	212	0	0	430290	5000	60077	0	0	7287	26500	443240	3284526	0	173588	563	2270379	0	0	0	374842	0	343078	89480	2282	59920	41452	733349	1223196	0	826266	0	1251	0	3066
EasternAfrica2007	0	0	5135	5470	182	0	22	105	30958	0	1440509	1098754	8260	4437057	11478	213	0	0	460198	6000	65358	0	0	8932	27000	531685	3234116	0	184300	406	2494072	0	0	0	382996	0	338986	65535	1820	64665	47861	769842	1253361	0	837724	0	1177	0	3030
EasternAfrica2008	0	0	5399	5398	183	0	23	95	31794	0	1436134	1048934	8720	4023459	9206	216	0	0	522582	7000	65467	0	0	11927	26839	352079	3343746	0	182011	487	3061379	0	0	0	407000	0	338415	85459	2350	60115	54626	792302	1382368	0	741353	0	1180	0	3047
EasternAfrica2009	0	0	6556	5347	191	0	26	96	35061	0	1465146	1222155	9398	4568076	8397	218	0	0	512292	8500	69060	0	0	10126	26916	513447	3994757	0	195494	677	2665719	0	0	0	380380	0	333454	99465	1950	59275	64425	825198	1309618	0	691336	0	1591	0	3059
EasternAfrica2010	0	0	5807	5402	195	0	26	97	38540	0	1451411	1141533	9350	4874642	8708	220	0	0	460165	9500	72441	0	0	11197	26978	404618	3874169	0	221226	619	2839030	0	0	0	415023	0	307200	91242	1720	58967	63953	858472	1429067	0	665106	0	1686	0	3068
EasternAfrica2011	0	0	5020	5410	196	0	27	97	40568	0	1564126	1038042	9550	4903198	9965	223	0	0	457725	9000	74820	0	0	10282	26983	592707	3901161	0	220608	544	2814731	0	0	0	458780	0	354887	117581	1950	58194	67680	871067	1276706	0	840185	0	1713	0	3077
EasternAfrica2012	0	0	5121	5412	201	0	27	100	40530	0	1362299	1107011	9500	5525367	9388	237	0	0	574261	18000	76850	0	0	9299	26900	536446	4143788	0	221500	575	2800487	0	0	0	575463	0	375674	148777	2050	52315	63358	877947	1285928	0	895943	0	1630	0	3095
EasternAfrica2013	0	0	5207	5353	202	0	27	101	44328	0	1403113	1107967	9510	5372976	9738	230	0	0	538658	20000	85757	0	0	11244	26900	542194	4030768	0	219500	592	3082798	0	0	0	503791	0	376781	116444	1580	53500	69501	873982	1479160	0	942535	0	1662	0	3100
EasternAfrica2014	0	0	5708	5376	206	0	30	101	47987	0	1430456	1092311	9334	5059751	9808	231	0	0	443702	24105	77230	0	0	12843	27000	550665	4015919	0	219024	599	3083988	0	0	0	494306	0	119034	99650	1462	52855	70141	901989	1419439	0	970953	0	1746	0	3128
[truncated: 108 more columns]

## Sheet: Eastern Asia
	Agavefibresnes	Almondswithshell	Anisebadianfennelcoriander	Apples	Apricots	Arecanuts	Artichokes	Asparagus	Avocados	Bambarabeans	Bananas	Barley	Bastfibresother	Beansdry	Beansgreen	Berriesnes	Blueberries	Brazilnutswithshell	Broadbeanshorsebeansdry	Buckwheat	Cabbagesandotherbrassicas	Canaryseed	Carobs	Carrotsandturnips	Cashewapple	Cashewnutswithshell	Cassava	Cassavaleaves	Castoroilseed	Cauliflowersandbroccoli	Cerealsnes	Cherries	Cherriessour	Chestnut	Chickpeas	Chicoryroots	Chilliesandpeppersdry	Chilliesandpeppersgreen	Cinnamoncanella	Cloves	Cocoabeans	Coconuts	Coffeegreen	Coir	Cowpeasdry	Cranberries	Cucumbersandgherkins	Currants	Dates
EasternAsia1961	0	0	0	174815	451	623	0	522500	0	0	13360	4985037	34000	3652023	100250	450	0	0	3607500	2565048	446422	0	0	64500	0	0	94000	0	102474	36912	4700	1280	0	13350	0	0	19000	304082	0	0	0	0	3115	0	14700	0	520383	0	1000
EasternAsia1962	0	0	0	181080	510	752	0	378000	0	0	14170	6599563	32000	4077642	98300	450	0	0	4221100	3357944	460495	0	0	69500	0	0	100000	0	105713	36973	5700	1410	0	14650	0	0	19000	225906	0	0	0	0	3455	0	14400	0	518489	0	1000
EasternAsia1963	0	0	0	181811	792	821	0	323500	0	0	18878	5598231	39000	3419590	100200	450	0	0	3217900	2754542	414364	0	0	70850	0	0	102343	0	117568	42014	7400	1500	0	18600	0	0	18000	195750	0	0	0	0	4043	0	11900	0	471682	0	1000
EasternAsia1964	0	0	0	187927	893	832	0	293790	0	0	24306	4830299	44000	3430977	102160	450	0	0	3216600	2552174	370152	0	0	72311	0	0	107314	0	135526	42028	9400	1580	0	25200	0	0	20000	179146	0	0	0	0	4657	0	11600	0	428331	0	1100
EasternAsia1965	0	0	0	204293	1012	989	0	304733	0	0	35693	4606810	59000	3402345	103200	450	0	0	3215500	2553633	379479	0	0	77968	0	0	108389	0	184265	43068	11100	1640	0	29800	0	0	20500	181123	0	0	0	0	5080	0	10600	0	428424	0	1200
EasternAsia1966	0	0	0	304971	1039	1088	0	296987	0	0	45762	3929226	117000	3096452	103850	450	0	0	3113400	2843822	369572	0	0	79368	0	0	112436	0	223483	44094	7500	1700	0	32600	0	0	20000	180604	0	0	0	0	6478	0	9940	0	414862	0	1250
EasternAsia1967	0	0	0	304999	1235	1065	0	294942	0	0	52357	3332591	118000	3077864	104350	450	0	0	3111200	2437935	380286	0	0	80442	0	0	119082	0	223047	46133	8900	1600	0	36300	0	0	20000	186633	0	0	0	0	7079	0	9140	0	414295	0	1250
EasternAsia1968	0	0	0	373702	1872	1205	0	288385	0	0	52056	3460916	99200	2957561	110300	450	0	0	3109300	2251217	385805	0	0	82615	0	0	140997	0	202892	47721	8000	1600	0	39800	0	0	21000	182435	0	0	0	0	7080	0	8400	0	423467	0	1150
EasternAsia1969	0	0	0	341998	1938	1233	0	289515	0	0	44878	3430885	93000	2846961	114300	450	0	0	3007700	2491668	392667	0	0	82077	0	0	151639	0	182952	51986	12200	1660	0	41400	0	0	22000	181066	0	0	0	0	7474	0	7700	0	423845	0	1150
EasternAsia1970	0	0	0	340633	2132	1261	0	192588	0	0	52263	3413812	90000	2853256	115350	700	0	0	3107000	2558478	375051	0	0	82219	0	0	160690	0	181958	52563	13500	1720	0	43000	0	0	20500	142458	0	0	0	0	7677	0	7500	0	285471	0	1150
EasternAsia1971	0	0	0	359160	2263	1333	0	223556	0	0	40450	3174128	88000	2446185	120350	700	0	0	2606500	2327880	397770	0	0	83262	0	0	169714	0	181203	54178	12500	2170	0	44800	0	0	22000	157083	0	0	0	0	7885	0	4000	0	314552	0	1150
EasternAsia1972	0	0	0	379028	2386	1347	0	217118	0	0	33050	3085461	112000	2352498	122350	700	0	0	2504400	2479015	379926	0	0	82831	0	0	180792	0	176676	55294	10000	2560	0	46100	0	0	21000	155238	0	0	0	0	8584	0	5300	0	309213	0	1150
EasternAsia1973	0	0	0	530283	2881	1261	0	242346	0	0	33671	3572775	167500	2339904	126300	700	0	0	2503200	2267806	392653	0	0	83439	0	0	190660	0	172000	55843	10100	2700	0	47600	0	0	21500	172186	0	0	0	0	7592	0	4600	0	336834	0	1150
EasternAsia1974	0	0	0	487936	3300	1400	0	233555	0	0	29043	2941689	192000	2232538	126350	700	0	0	2302700	2150427	385489	0	0	85002	0	0	193581	0	174000	57487	8000	2790	0	49200	0	0	22000	171495	0	0	0	0	7599	0	4000	0	326846	0	1150
EasternAsia1975	0	0	0	599467	3396	1450	0	243584	0	0	23072	2632510	199000	2225205	126393	700	0	0	2302275	2054459	368002	0	0	86475	0	0	198535	0	173000	59028	6684	2880	0	51800	0	0	23000	227639	0	0	0	0	7577	0	2730	0	331646	0	1150
EasternAsia1976	0	0	0	661604	3576	1550	0	239136	0	0	13401	2429774	214000	2214213	127263	700	0	0	2302025	2022276	374796	0	0	88551	0	0	198049	0	168041	59955	4978	2880	0	51600	0	0	23500	237593	0	0	0	0	8050	0	2430	0	333646	0	1150
EasternAsia1977	0	0	0	704609	4054	1600	0	249941	0	0	13712	2263802	240000	2215435	128308	650	0	0	2302050	1838262	385821	0	0	87325	0	0	207640	0	170995	62075	4244	2830	0	64300	0	0	23500	239140	0	0	0	0	8071	0	2460	0	347646	0	1400
EasternAsia1978	0	0	0	726616	4178	1927	0	278767	0	0	14768	2342488	255000	1984313	129336	650	0	0	2101650	2037468	431950	0	0	91378	0	0	216655	0	190500	64581	2980	2850	0	71200	0	0	24000	224739	0	0	0	0	8075	0	1980	0	390085	0	1500
EasternAsia1979	0	0	0	904782	4256	2201	0	274675	0	0	14925	2210857	231000	2186120	130190	650	0	0	2301475	1861368	438744	0	0	95294	0	0	214740	0	190400	65713	3245	2820	0	81800	0	0	23000	260590	0	0	0	0	9075	0	1500	0	383389	0	1500
EasternAsia1980	0	0	0	886853	4431	2326	0	268808	0	0	14383	1853407	183000	2182380	130174	650	0	0	2301630	1713714	443157	0	0	97651	0	0	238376	0	200100	67737	6475	2780	0	84600	0	0	24000	279805	0	0	0	0	10075	0	1300	0	379194	0	1800
EasternAsia1981	0	0	0	877097	4333	2839	0	288769	0	0	17877	1823215	181000	2187017	150170	650	0	0	2201420	1831518	455649	0	0	100444	0	0	241360	0	200100	69270	5179	2720	0	75800	0	0	24000	308286	0	0	0	0	12076	0	1430	0	408813	0	1800
EasternAsia1982	0	0	0	873257	4299	3125	0	319226	0	0	21752	1701279	145000	1999773	160230	650	0	0	1901290	1542593	462948	0	0	105588	0	0	243369	0	200100	70046	10077	2620	0	79000	0	0	24500	285809	0	0	0	0	12078	0	1530	0	448658	0	1800
EasternAsia1983	0	0	0	877269	4404	3944	0	316000	0	0	22227	1791359	134000	1991396	182210	650	0	0	1921210	1779297	456019	0	0	102916	0	0	245422	0	215050	71607	16593	2600	0	80800	0	0	26000	297702	0	0	0	0	13000	0	1080	0	457112	0	1800
EasternAsia1984	0	0	0	912329	4335	4645	0	316900	0	0	28649	1800173	192000	1979298	200200	650	0	0	1801110	1777055	473189	0	0	105445	0	0	244685	0	207050	76211	17753	2590	0	78400	0	0	25500	280288	0	0	0	0	16000	0	1100	0	460839	0	2000
EasternAsia1985	0	7700	20000	918953	4438	6082	0	316903	0	0	55428	1525935	510000	1868651	206180	650	0	0	1700900	1706399	479054	0	0	104460	0	12000	243946	0	233050	81261	13149	2630	0	118700	0	0	25000	303234	35000	0	0	11000	13000	0	700	0	465871	0	2500
EasternAsia1986	0	8300	23750	1334982	5080	6960	0	349296	0	0	79786	1558543	145000	1869377	236190	650	0	0	1700842	1631314	492699	0	0	105852	0	14000	233436	0	255050	84748	14113	2640	0	114400	0	0	29000	315366	35000	1500	0	12000	14000	0	890	0	465539	0	3000
EasternAsia1987	0	8900	23000	1606646	5487	9553	0	377120	0	0	162070	1466734	100000	1886735	275180	630	0	0	1700773	1636320	483503	0	0	109163	0	16000	232801	0	267022	87100	12316	2640	0	119100	0	0	27000	277393	35000	1500	0	13000	15000	0	800	0	472470	0	3200
EasternAsia1988	0	8600	23000	1828918	7884	16092	0	386419	0	0	152411	1450659	102000	1786477	284170	700	0	0	1600734	1634720	490580	0	0	110334	0	16000	231911	0	270015	87693	8967	2720	0	119300	0	0	27000	293667	35000	1500	0	10000	18000	0	900	0	477176	0	3400
EasternAsia1989	0	9400	23000	1861522	7895	22378	0	415249	0	0	121165	1605346	106000	1785728	303530	800	0	0	1600673	1481216	496616	0	0	113615	0	1000	226384	0	270011	91009	7998	2870	0	121800	0	0	28000	272117	35000	1500	0	11000	15000	0	200	0	481264	0	3200
EasternAsia1990	0	10000	18721	1804158	7970	24291	0	442190	0	0	118920	1591282	110000	1679220	323289	800	0	0	1449557	1532662	514136	0	0	119913	0	1500	231115	0	275005	91109	6036	3050	0	122196	0	0	28500	270396	28488	1221	0	13409	12000	0	800	0	485334	0	2500
EasternAsia1991	0	10500	23311	1840546	8357	26965	0	481209	0	0	142397	1991595	99750	1164851	328020	830	0	0	830495	1734817	532137	0	0	129144	0	3000	230777	0	280000	94133	4899	3250	0	139565	0	0	28000	288412	29536	1100	0	11598	6500	0	900	0	494970	0	5300
EasternAsia1992	0	10900	24000	2095344	10508	29232	3000	460803	2000	0	191722	1895194	102000	1094256	345472	1200	0	0	860362	2022165	539747	0	0	126941	0	2386	230895	0	240000	91476	5118	3410	0	144482	1500	0	29000	278576	29400	600	0	12787	7000	0	906	0	465601	0	5600
EasternAsia1993	0	9845	25000	2422173	11131	32632	3558	559525	2000	0	205463	1791397	101000	1622808	262768	1300	0	0	1000310	1463200	642942	0	0	152976	0	3500	231779	0	270000	126057	3481	3570	0	137135	2000	0	30000	359992	29277	667	0	14772	7068	0	0	0	575796	0	6000
EasternAsia1994	0	10317	26000	2863457	12079	36316	4000	579916	4000	0	159175	1849552	55000	1837264	272796	1600	0	0	1160260	1295312	695339	0	0	177414	0	4000	235819	0	247000	145818	3711	3680	0	144782	1500	0	31045	406221	24304	673	0	17535	6260	0	0	0	655197	0	8000
EasternAsia1995	0	11000	26203	3121357	13397	42456	4502	619483	4000	0	198188	1929084	46460	1727946	278115	1500	0	0	1000220	1229486	732860	0	0	189250	0	4900	235663	0	190000	153882	4043	3190	0	137848	1500	0	29698	418989	29063	628	0	18944	6000	0	0	0	693891	0	6500
EasternAsia1996	0	12136	27000	3148886	13619	46381	5000	689319	5000	0	182111	1829613	46500	1612316	292820	1500	0	0	1047857	1221306	864927	0	0	218612	0	5000	236343	0	200000	189022	4788	4390	0	148447	1374	0	30201	473533	31198	655	0	19739	5500	0	0	0	782668	0	6800
EasternAsia1997	0	12000	28000	2995058	13441	47614	5278	708564	5000	0	189104	1819388	51000	1455669	303263	1800	0	0	950180	1180340	914385	0	0	252572	0	6000	238018	0	220000	201211	4096	5000	0	161764	1050	0	33000	491181	32092	627	0	21098	7400	0	0	0	881487	0	7000
EasternAsia1998	0	12500	28500	2771689	13854	49401	6000	733645	6000	0	187365	1554538	29710	1602009	312090	2000	0	0	1076184	1120364	1018136	0	0	282467	0	6200	238980	0	209000	213257	4383	5650	0	166100	1520	0	33406	499652	32637	562	0	20613	4400	0	0	0	983307	0	5000
EasternAsia1999	0	10500	29000	2585547	31123	51207	6500	788177	7500	0	211765	1491107	21000	1562571	327200	2500	0	0	1078187	1046744	1158444	0	0	302640	0	5300	236508	0	270000	228927	11975	5750	0	177633	1500	0	34000	561567	35664	594	0	22504	7000	0	8	0	1082896	0	6000
EasternAsia2000	0	8000	30000	2398227	33500	51617	7500	919192	8000	0	258199	1226668	16600	1636904	372185	3000	0	0	1150189	1190369	1372723	0	0	348728	0	3200	239245	0	290000	263786	14471	5820	0	180191	1290	0	35000	610584	36000	693	0	24484	9600	0	6	0	1191596	0	6000
EasternAsia2001	0	10000	29000	2207450	34245	51027	8000	968768	8000	0	254027	960025	17150	1767594	427214	3000	0	0	1325190	1116668	1269057	0	0	369912	0	2300	241222	0	270000	278893	17329	6920	0	184455	2000	0	35043	637301	37000	676	0	25374	14600	0	6	0	1181122	0	6000
EasternAsia2002	0	10700	30000	2078377	35781	51203	8999	1048930	8500	0	257563	1101024	18000	1871708	457211	3000	0	0	1250100	904866	1208803	0	0	398530	0	2700	246202	0	270000	314536	20537	7470	0	196534	2000	0	35500	677505	38000	622	0	27185	15600	0	6	0	1130706	0	7000
EasternAsia2003	0	10847	31000	2039127	36425	50787	9000	1087633	9000	0	265153	938964	13000	1732479	476039	3000	0	0	1180096	866167	1164600	0	0	433281	0	2500	250696	0	267000	325274	19019	7690	0	209300	2700	0	36000	694503	39498	669	0	28042	16000	0	6	0	1079588	7	7000
EasternAsia2004	0	11000	31433	2017297	35257	50058	9648	1157629	10000	0	273714	944049	10240	1575314	502152	3000	0	0	1060093	845563	1140769	0	0	451312	0	2100	245767	0	260000	364630	18083	8080	0	240899	2300	0	36641	704520	39000	751	0	28361	12000	0	6	0	1028651	5	7000
EasternAsia2005	0	12000	32000	2031121	36373	50337	10000	1167421	12000	0	285203	979989	9950	1631470	527121	3500	0	0	1045102	880957	1101934	0	0	461657	0	1600	260756	0	240000	375170	19491	8880	0	249600	2400	0	36500	709400	40000	650	0	29014	15500	0	5	0	1078199	5	9000
EasternAsia2006	0	12102	33000	2040566	37116	49290	10463	1207251	12500	0	295860	1006646	9000	1372513	552085	3500	0	0	875103	915586	1055694	0	0	466564	0	1600	265657	0	230000	395905	22046	9490	0	289300	2000	0	38000	720308	42000	700	0	28827	14400	0	0	0	1027792	6	8000
EasternAsia2007	0	12250	34000	2101626	37160	49831	10703	1257263	13000	0	317834	914593	10000	1390837	567050	3500	0	0	962104	798510	1026338	0	0	465275	0	1600	268580	0	210000	416230	18532	9990	0	305566	2000	0	40000	743852	45000	750	0	29632	15110	0	6	0	1126663	5	8500
EasternAsia2008	0	12361	35000	2132667	37883	49300	9842	1272225	14000	0	328952	932455	8000	1423838	589330	4000	0	0	945104	774733	1029694	0	0	457104	0	1650	270422	0	220000	421875	18453	10490	0	327500	2500	0	41000	736525	41529	800	0	29771	16280	0	18	0	1032739	5	9000
EasternAsia2009	0	12500	36000	2190443	39449	48269	9650	1277145	15000	0	350261	764056	7200	1328402	577378	4200	0	0	875105	771576	1003971	0	0	459519	0	1620	275313	0	200000	432741	15828	11450	0	347438	2500	0	42000	740933	40019	847	0	30719	22530	0	18	0	1060963	5	10000
EasternAsia2010	0	13000	37000	2281012	38609	45832	10000	1287066	15500	0	370812	782513	5700	1339193	595928	4470	0	0	870104	749806	1023106	0	0	473847	0	1666	278733	0	190000	446127	21097	11731	0	358949	3000	0	43000	759312	40000	894	0	30609	25007	0	17	0	1095310	6	10292
EasternAsia2011	0	14000	37503	2319262	37653	45952	11000	1326875	16000	0	399319	632070	5800	1340985	595799	4564	0	0	872109	806846	1065045	0	0	490718	0	1173	275583	0	190000	461194	22024	11834	0	362400	3000	0	42937	780374	40924	933	0	31964	29550	0	16	0	1137376	6	10788
EasternAsia2012	0	14500	37000	2373153	37067	45521	12000	1356644	16500	0	407663	595694	5270	1152179	618922	4650	0	0	829124	764089	1051143	0	0	494216	0	955	280601	0	120000	462961	25105	12081	0	368000	3300	0	43000	786164	40000	1000	0	31894	37800	0	12015	0	1181625	20	11500
EasternAsia2013	0	14500	37500	2413524	37134	45329	12000	1336378	17000	0	405055	573854	5130	1041791	630832	4815	0	0	725125	768792	1057615	0	0	436800	0	855	285587	0	57000	468334	35978	12517	0	369803	2650	0	44000	789041	41000	1000	0	32504	49600	0	12515	0	1188148	6	12111
EasternAsia2014	0	14443	37951	2412767	38005	44511	11653	1323460	17500	0	405302	585880	4063	1018203	635385	4978	0	0	701725	769995	1102798	0	0	428892	0	802	286257	0	46000	493659	36896	12936	0	355726	2660	0	45442	782383	41245	990	0	32151	45871	0	13014	0	1202597	5	12764
[truncated: 108 more columns]

## Sheet: Eastern Europe
	Agavefibresnes	Almondswithshell	Anisebadianfennelcoriander	Apples	Apricots	Arecanuts	Artichokes	Asparagus	Avocados	Bambarabeans	Bananas	Barley	Bastfibresother	Beansdry	Beansgreen	Berriesnes	Blueberries	Brazilnutswithshell	Broadbeanshorsebeansdry	Buckwheat	Cabbagesandotherbrassicas	Canaryseed	Carobs	Carrotsandturnips	Cashewapple	Cashewnutswithshell	Cassava	Cassavaleaves	Castoroilseed	Cauliflowersandbroccoli	Cerealsnes	Cherries	Cherriessour	Chestnut	Chickpeas	Chicoryroots	Chilliesandpeppersdry	Chilliesandpeppersgreen	Cinnamoncanella	Cloves	Cocoabeans	Coconuts	Coffeegreen	Coir	Cowpeasdry	Cranberries	Cucumbersandgherkins	Currants	Dates
EasternEurope1961	0	0	1388	811685	53486	0	0	1731	0	0	0	15883414	25000	1765678	32331	0	0	0	6968	1955889	445400	0	0	125672	0	0	0	0	101336	10449	94000	22007	24460	0	1178	4798	19700	46488	0	0	0	0	0	0	0	0	263209	2700	0
EasternEurope1962	0	0	1845	887443	59821	0	0	1805	0	0	0	18659592	25000	1766096	25897	0	0	0	11719	2344680	446393	0	0	127242	0	0	0	0	124438	12025	92000	24220	27600	0	1157	4454	20100	48614	0	0	0	0	0	0	0	0	265958	2700	0
EasternEurope1963	0	0	2084	921513	59967	0	0	1231	0	0	0	22965464	25000	1978852	32539	0	0	0	14032	1875749	454216	0	0	130962	0	0	0	0	133963	12304	93500	24404	27680	0	1273	4240	21600	52932	0	0	0	0	0	0	0	0	281346	3300	0
EasternEurope1964	0	0	1296	948382	59952	0	0	958	0	0	0	24175093	25000	2043993	30575	0	0	0	13145	1426574	459056	0	0	133145	0	0	0	0	171708	17531	119500	27469	30740	0	1344	4908	22729	47762	0	0	0	0	0	0	0	0	279402	3300	0
EasternEurope1965	0	0	2661	1005972	64931	0	0	1177	0	0	0	22186543	23000	1828341	33807	0	0	0	10475	1846496	440347	0	0	128123	0	0	0	0	197505	16701	112618	26856	29980	0	1761	3382	21494	45667	0	0	0	0	0	0	0	0	261153	3300	0
EasternEurope1966	0	0	5498	951655	58843	0	0	1151	0	0	0	21913479	23000	1831966	35950	0	0	0	13393	1893547	446962	0	0	127958	0	0	0	0	186080	18465	65873	23004	29000	0	2583	3080	21439	54699	0	0	0	0	0	0	0	0	267118	3350	0
EasternEurope1967	0	0	2639	1096983	54606	0	0	1169	0	0	0	21571641	23000	1745029	33579	0	0	0	12173	1777480	432325	0	0	126009	0	0	0	0	195527	18500	48265	23140	31100	0	2968	3573	24535	55581	0	0	0	0	0	0	0	0	269961	4000	0
EasternEurope1968	0	0	2557	1154421	59162	0	0	1251	0	0	0	21771779	23000	1565367	34285	0	0	0	9104	1748255	443511	0	0	130499	0	0	0	0	206436	17990	40682	28302	31500	0	728	3651	23409	59150	0	0	0	0	0	0	0	0	276764	4220	0
EasternEurope1969	0	0	3689	1196124	79088	0	0	563	0	0	0	25123284	23000	1392043	30161	0	0	0	7812	2106249	449938	0	0	133182	0	0	0	0	197620	19010	30662	28423	31200	0	833	3289	23999	58835	0	0	0	0	0	0	0	0	279356	4329	0
EasternEurope1970	0	0	2108	1655275	91915	0	0	609	0	0	0	23998349	23000	1378494	31241	0	0	0	5516	1940207	463368	0	0	136503	0	0	0	0	240866	18828	37103	37659	39000	0	954	3346	24321	57946	0	0	0	0	0	0	0	0	285816	6968	0
EasternEurope1971	0	0	1670	1618147	77782	0	0	540	0	0	0	24410944	25000	1250183	29655	0	0	0	4931	1825158	460643	0	0	137035	0	0	0	0	212628	18343	34200	42705	64400	0	1399	2989	22404	60762	0	0	0	0	0	0	0	0	278565	7924	0
EasternEurope1972	0	0	1833	1674773	94090	0	0	661	0	0	0	30131784	24000	1274374	32182	0	0	0	3917	1762195	462298	0	0	141917	0	0	0	0	231023	12580	37504	33823	34600	0	1888	3132	29328	68042	0	0	0	0	0	0	0	0	277877	7964	0
EasternEurope1973	0	0	1854	1649333	94461	0	0	659	0	0	0	32417526	19000	1058382	33799	0	0	0	4387	1685071	484891	0	0	150837	0	0	0	0	224577	17237	30020	33798	37500	0	2215	2815	27112	67793	0	0	0	0	0	0	0	0	281900	10036	0
EasternEurope1974	0	0	2340	1657642	118397	0	0	800	0	0	0	34341827	16000	1109415	34860	0	0	0	16045	1630375	494354	0	0	159183	0	0	0	0	217504	16126	114053	44913	49500	0	1756	3076	31258	57579	0	0	0	0	0	0	0	0	280434	10075	0
EasternEurope1975	0	0	5444	1760607	76430	0	0	700	0	0	0	36129006	16000	1031484	34552	0	0	0	38133	1493045	498591	0	0	162520	0	0	0	0	229800	17352	39038	44130	51800	0	1992	2799	34355	53058	0	0	0	0	0	0	0	0	277846	9945	0
EasternEurope1976	0	0	6388	1790283	76073	0	0	1024	0	0	0	37525411	18000	987284	32420	0	0	0	26750	1473860	481131	0	0	160596	0	0	0	0	200100	19066	33215	44245	46800	0	765	3086	40453	63591	0	0	0	0	0	0	0	0	262154	12881	0
EasternEurope1977	0	0	5710	1776071	76450	0	0	707	0	0	0	37948833	18000	851278	34397	0	0	0	48246	1780291	467725	0	0	162784	0	0	0	0	193500	17137	22099	40238	49300	0	307	3497	42373	66181	0	0	0	0	0	0	0	0	263551	12631	0
EasternEurope1978	0	0	5176	1756202	67486	0	0	944	0	0	0	36219169	17000	771843	34355	0	0	0	53109	1834421	511781	0	0	169534	0	0	0	0	164300	17412	60991	43038	49600	0	845	3428	41560	66926	0	0	0	0	0	0	0	0	265862	14469	0
EasternEurope1979	0	0	5187	1872025	40692	0	0	995	0	0	0	40949534	18000	559048	39237	0	0	0	41064	1734507	493829	0	0	167296	0	0	0	0	195800	18508	23549	36875	71000	0	1769	2666	41868	66919	0	0	0	0	0	0	0	0	278157	14415	0
EasternEurope1980	0	0	4200	1597416	92321	0	0	598	0	0	0	35266209	18000	615132	39797	0	0	0	40579	1824247	531652	0	0	179365	0	0	0	0	197500	18056	19044	37946	58000	0	1761	2331	43010	64455	0	0	0	0	0	0	0	0	266797	16285	0
EasternEurope1981	0	0	103	1571928	93183	0	0	613	0	0	0	35615387	18000	537284	39321	0	0	0	36253	1939585	520043	0	0	188555	0	0	0	0	155300	19714	26248	38280	57300	0	1753	3951	43623	67057	0	0	0	0	0	0	0	0	273200	20211	0
EasternEurope1982	0	0	114	1727087	47034	0	0	358	0	0	0	33463128	18000	546726	37042	0	0	0	26519	1789454	523978	0	0	178224	0	0	0	0	167900	19139	29117	36749	59400	0	1745	4313	41068	66241	0	0	0	0	0	0	0	0	248624	15190	0
EasternEurope1983	0	0	217	1682031	56516	0	0	355	0	0	0	34937198	18000	739029	35009	0	0	0	18052	1822561	517973	0	0	180345	0	0	0	0	162100	20255	23881	39010	58800	0	1737	5296	46359	64365	0	0	0	0	0	0	0	0	246703	16166	0
EasternEurope1984	0	0	0	1681767	44145	0	0	348	0	0	0	33513372	18000	748984	34203	0	0	0	14528	1744179	524854	0	0	182755	0	0	0	0	156400	20760	26877	36798	58700	0	1729	4140	48395	66439	0	0	0	0	0	0	0	0	249209	15205	0
EasternEurope1985	0	17285	5500	1935578	75061	0	0	550	0	0	0	32308460	18000	309166	34543	0	0	0	13576	1732715	490650	0	0	174331	0	0	0	0	153500	21439	19586	88744	117700	4350	1721	4323	50312	66852	0	0	0	0	0	0	0	0	240935	55401	0
EasternEurope1986	0	21215	5950	1880773	72619	0	0	522	0	0	0	33370728	18000	321064	32911	0	0	0	14139	1623380	515764	0	0	183277	0	0	0	0	154300	21376	16332	88396	96040	4450	1713	5481	50247	67755	0	0	0	0	0	0	0	0	241587	54153	0
EasternEurope1987	0	22775	6140	1814452	76801	0	0	585	0	0	0	33939954	20000	314724	38322	0	0	0	13158	1680464	592426	0	0	192401	0	0	0	0	149300	23208	34029	85651	94840	4265	1705	5326	49020	68525	0	0	0	0	0	0	0	0	251802	47314	0
EasternEurope1988	0	23650	6800	1812455	76031	0	0	547	0	0	0	33026859	21000	325741	38077	0	0	0	13297	1725448	524142	0	0	198273	0	0	0	0	143500	23023	29557	87977	105350	4965	1700	4990	46457	70446	0	0	0	0	0	0	0	0	252893	56915	0
EasternEurope1989	0	27000	7300	1763241	80718	0	0	1123	0	0	0	29452313	22000	319955	38097	1000	250	0	15927	1777272	530569	0	0	200836	0	0	0	0	111300	22936	53194	87076	105580	5290	1700	8241	52004	72975	0	0	0	0	0	0	0	715	251389	58107	0
EasternEurope1990	0	27889	4600	1778378	77984	0	0	559	0	0	0	29494720	19507	183340	25090	1300	672	0	18670	1902074	479155	0	0	183733	0	0	0	0	73500	21942	56302	85424	105260	5020	4600	1771	39336	66177	0	0	0	0	0	0	0	800	212264	50782	0
EasternEurope1991	0	27750	8740	1609681	77983	0	0	587	0	0	0	32379441	0	152188	23201	1948	1049	0	19585	2417913	482460	26000	0	207407	0	0	0	0	34400	21829	55629	85833	104494	5351	8100	2616	39751	54221	0	0	0	0	0	0	0	1000	232481	51556	0
EasternEurope1992	0	5527	13400	1282095	89368	0	0	498	0	0	0	22794232	20000	208216	26140	450	1370	0	16981	2230239	367877	30000	100	145100	0	0	0	0	11840	19318	90255	122168	147713	444	3198	1405	36965	68182	0	0	0	0	0	0	0	400	193513	70247	0
EasternEurope1993	0	5587	26533	1340538	73330	0	0	636	0	0	0	24426739	21000	174375	25172	2005	1716	0	14168	2326783	362732	28000	100	149481	0	0	0	0	10705	20352	60912	113691	149160	794	4283	1283	37745	64080	0	0	0	0	0	0	0	500	189275	70870	0
EasternEurope1994	0	5241	29434	1361380	59363	0	0	1638	0	0	0	26417519	21339	180267	25138	1781	1800	0	12908	2349190	353567	27000	100	156911	0	0	0	0	4460	20556	76158	90307	150244	711	4007	1223	40039	67441	0	0	0	0	0	0	0	400	191550	69531	0
EasternEurope1995	0	4580	28643	1301204	62791	0	0	2148	0	0	0	23500960	23098	206467	25640	3364	2900	0	10945	2119405	367779	30000	100	164213	0	0	0	0	2099	20274	65289	94203	147138	880	6710	1319	43769	76054	0	0	0	0	0	0	0	400	217060	68092	0
EasternEurope1996	0	6707	32679	1253494	64088	0	0	2178	0	0	0	19301220	22312	241925	21755	3272	3500	0	9210	1838952	376260	29437	100	156875	0	0	0	0	3429	18288	64593	91560	153350	939	7550	1333	46058	61589	0	0	0	0	0	0	0	500	196409	76174	0
EasternEurope1997	0	6731	34021	1261925	71540	0	0	2468	0	0	0	19975053	22120	279006	22657	3552	3570	0	9835	1439374	371304	18415	100	172518	0	0	0	0	2425	19381	71500	93081	146878	954	5191	1429	42437	64119	0	0	0	0	0	0	0	700	202622	74310	0
EasternEurope1998	0	7000	37960	1133305	54476	0	0	3212	0	0	0	14722201	20922	306788	22566	3580	3985	0	11317	1402238	361765	26851	100	167570	0	0	0	0	2727	20703	83164	88741	146062	1100	6684	1443	40777	68753	0	0	0	0	0	0	0	1200	200250	77243	0
EasternEurope1999	0	3200	45776	1171275	58295	0	200	3518	0	0	0	14716198	21000	282148	23612	7332	4400	0	12605	1506910	396443	18348	100	187046	0	0	0	0	2720	21043	71650	85119	132731	1034	7326	1539	38806	69916	0	0	0	0	0	0	0	900	199924	83270	0
EasternEurope2000	0	2900	41072	1126266	57049	0	209	3360	0	0	0	15766006	21000	273737	21091	6925	5607	0	13109	2059681	411138	20081	100	199386	0	0	0	0	2400	21020	86334	82874	147984	1194	8994	1720	42990	66199	0	0	0	0	0	0	0	1500	199176	95309	0
EasternEurope2001	0	3404	42998	1123119	51376	0	230	3629	0	0	0	17428293	22000	263853	17086	7116	5550	0	13665	1732570	395762	5668	100	188660	0	0	0	0	2060	21696	100561	84941	154851	1150	14404	1792	45155	59016	0	0	0	0	0	0	0	1334	186934	100717	0
EasternEurope2002	0	4346	53428	1151411	51756	0	237	3430	0	0	0	17484771	22354	243706	16569	8138	5400	0	15733	922656	366073	8949	100	186541	0	0	0	0	2090	18544	103774	79870	149628	787	16968	1834	44929	60753	0	0	0	0	0	0	0	1330	213985	122573	0
EasternEurope2003	0	3659	58910	1005392	56151	0	244	3548	0	0	0	17301865	23000	170984	17943	8116	7036	0	31713	1017110	378037	15573	100	204689	0	0	0	0	1640	20958	100396	78450	150530	939	23415	2127	45765	60626	0	0	0	0	0	0	0	1120	203024	120886	0
EasternEurope2004	0	2826	62724	997137	58005	0	244	3877	0	0	0	17599668	23042	175464	13982	8203	5581	0	36426	1320719	363364	11649	100	203383	0	0	0	0	680	21791	74445	78822	150419	721	19627	2065	45660	54660	0	0	0	0	0	0	0	1300	195894	121569	0
EasternEurope2005	0	2508	46904	982530	53049	0	235	3958	0	0	0	16681364	22514	180672	15348	8492	3450	0	37449	1309461	367733	10201	100	201088	0	0	0	0	980	23135	64062	77669	145254	834	16263	1908	45276	48511	0	0	0	0	0	0	11	1404	193177	130746	0
EasternEurope2006	0	2292	43237	904893	49672	0	219	4910	0	0	0	18352026	18774	178108	16838	8310	2860	0	39845	1525225	302788	7997	100	211643	0	0	0	0	1200	22517	61481	74787	140309	832	16852	1898	41469	57704	0	0	0	0	0	0	10	1601	201311	120891	0
EasternEurope2007	0	2528	37276	898707	49524	0	160	4269	0	0	0	16044968	17441	145694	14598	10022	3481	0	25116	1590423	290309	6206	100	174167	0	0	0	0	610	22703	67158	76050	142418	1023	24565	1710	36308	48936	0	0	0	0	0	0	10	1398	161485	122254	0
EasternEurope2008	0	2506	54458	725252	41453	0	100	3838	0	0	0	17171742	14410	139076	16513	9335	3742	0	19842	1372101	305940	6309	100	179525	0	0	0	0	1520	22244	92944	64169	119212	1120	34258	1510	41111	47371	0	0	0	0	0	0	9	1500	165119	105070	0
EasternEurope2009	0	1115	81757	708736	41280	0	50	3213	0	0	0	16373498	13987	146640	15460	8617	3467	0	20040	972780	297781	6681	100	176090	0	0	0	0	600	23832	87730	66237	117916	1104	52621	1947	44632	49217	0	0	0	0	0	0	8	2288	166465	104166	0
EasternEurope2010	0	1950	78754	694534	39972	0	43	3169	0	0	0	12741959	13625	153651	14561	15934	3256	0	18352	884798	288759	4207	100	166725	0	0	0	0	400	22006	105704	69109	115470	727	52771	1657	48895	50173	0	0	0	0	0	0	0	2231	160512	106288	0
EasternEurope2011	0	1698	82472	695556	39445	0	45	3803	0	0	0	14532285	13200	141930	13780	11803	3481	0	16598	1247969	304561	3264	100	178696	0	0	0	0	300	23100	87016	67567	116256	772	65218	1596	53494	48306	0	0	0	0	0	0	0	1875	165425	97455	0
EasternEurope2012	0	1333	74040	700511	34850	0	53	3556	0	0	0	14163486	13200	169697	13405	12671	4071	0	12771	1418394	288863	5130	100	169314	0	0	0	0	500	23946	79272	60322	114595	690	75981	1922	61768	45957	0	0	0	0	0	0	0	2000	165070	98371	0
EasternEurope2013	0	1173	68760	706986	34713	0	68	3535	0	0	0	14162091	13200	169606	12162	13314	4222	0	12132	1177562	286693	1890	100	165477	0	0	0	0	0	20615	69366	60309	115025	700	87603	1112	57246	46118	0	0	0	0	0	0	0	1965	161975	99560	0
EasternEurope2014	0	1157	93612	666177	34309	0	55	3718	0	0	0	14960538	13200	202744	12618	11783	4444	0	10702	931748	277078	3044	100	167720	0	0	0	0	0	22196	73199	57862	112864	676	96123	1174	52063	41741	0	0	0	0	0	0	0	18355	161108	100723	0
[truncated: 108 more columns]

## Sheet: Melanesia
	Agavefibresnes	Almondswithshell	Anisebadianfennelcoriander	Apples	Apricots	Arecanuts	Artichokes	Asparagus	Avocados	Bambarabeans	Bananas	Barley	Bastfibresother	Beansdry	Beansgreen	Berriesnes	Blueberries	Brazilnutswithshell	Broadbeanshorsebeansdry	Buckwheat	Cabbagesandotherbrassicas	Canaryseed	Carobs	Carrotsandturnips	Cashewapple	Cashewnutswithshell	Cassava	Cassavaleaves	Castoroilseed	Cauliflowersandbroccoli	Cerealsnes	Cherries	Cherriessour	Chestnut	Chickpeas	Chicoryroots	Chilliesandpeppersdry	Chilliesandpeppersgreen	Cinnamoncanella	Cloves	Cocoabeans	Coconuts	Coffeegreen	Coir	Cowpeasdry	Cranberries	Cucumbersandgherkins	Currants	Dates
Melanesia1961	0	0	0	0	0	0	0	0	0	0	27334	0	0	0	56	10500	0	0	0	0	0	0	0	0	0	0	12783	0	0	0	0	0	0	0	0	0	0	0	0	0	28824	348000	11500	0	0	0	0	0	0
Melanesia1962	0	0	0	0	0	0	0	0	0	0	28084	0	0	0	38	10500	0	0	0	0	0	0	0	0	0	0	13136	0	0	0	0	0	0	0	0	0	0	0	0	0	32375	352000	11420	0	0	0	0	0	0
Melanesia1963	0	0	0	0	0	0	0	0	0	0	29019	0	0	0	30	10500	0	0	0	0	0	0	0	0	0	0	13387	0	0	0	0	0	0	0	0	0	0	0	0	0	34125	354000	12420	0	0	0	0	0	0
Melanesia1964	0	0	0	0	0	0	0	0	0	0	29435	0	0	0	16	11000	0	0	0	0	0	0	0	0	0	0	13638	0	0	0	0	0	0	0	0	0	0	0	0	0	57515	354000	14420	0	0	0	0	0	0
Melanesia1965	0	0	0	0	0	0	0	0	0	0	28774	0	0	0	11	11500	0	0	0	0	0	0	0	0	0	0	13637	0	0	0	0	0	0	0	0	0	0	0	0	0	41640	354000	15524	0	0	0	0	0	0
Melanesia1966	0	0	0	0	0	0	0	0	0	0	29433	0	0	0	16	11500	0	0	0	0	0	0	0	0	0	0	14040	0	0	0	0	0	0	0	0	0	0	0	0	0	38700	352000	17524	0	0	0	0	0	0
Melanesia1967	0	0	0	0	0	0	0	0	0	0	30030	0	0	0	15	12000	0	0	0	0	0	0	0	0	0	0	14101	0	0	0	0	0	0	0	0	0	0	0	0	0	46605	355000	20700	0	0	0	0	0	0
Melanesia1968	0	0	0	0	0	0	0	0	0	0	31836	0	0	0	15	12500	0	0	0	0	0	0	0	0	0	0	14594	0	0	0	0	0	0	0	0	0	0	0	0	0	54595	347763	21907	0	0	0	0	0	0
Melanesia1969	0	0	0	0	0	0	0	0	0	0	32061	0	0	0	10	12500	0	0	0	0	0	0	0	0	0	0	14313	0	0	0	0	0	0	0	0	0	0	0	0	0	56931	354662	23557	0	0	0	0	0	0
Melanesia1970	0	0	0	0	0	0	0	0	0	0	33096	0	0	0	8	13000	0	0	0	0	0	0	0	0	0	0	14615	0	0	0	0	0	0	0	0	0	0	0	0	0	56579	349600	26854	0	0	0	0	0	0
Melanesia1971	0	0	0	0	0	0	0	0	0	0	32617	0	0	0	11	13500	0	0	0	0	0	0	0	0	0	0	11314	0	0	0	0	0	0	0	0	0	0	0	0	0	56682	350600	26763	0	0	0	0	0	0
Melanesia1972	0	0	0	0	0	0	0	0	0	0	32917	0	0	0	12	14000	0	0	0	0	0	0	0	0	0	0	10015	0	0	0	0	0	0	0	0	0	0	0	0	0	61817	344600	28610	0	0	0	0	0	0
Melanesia1973	0	0	0	0	0	0	0	0	0	0	31737	0	0	0	2	14000	0	0	0	0	0	0	0	0	0	0	9023	0	0	0	0	0	0	0	0	0	0	0	0	0	64120	351600	30058	0	0	0	0	0	0
Melanesia1974	0	0	0	0	0	0	0	0	0	0	34477	0	0	0	23	14500	0	0	0	0	0	0	0	0	0	0	9251	0	0	0	0	0	0	0	0	0	0	0	0	0	72710	353400	31510	0	0	0	0	0	0
Melanesia1975	0	0	0	0	0	0	0	0	0	0	35807	0	0	0	8	14500	0	0	0	0	0	0	0	0	0	0	9486	0	0	0	0	0	0	0	0	0	0	0	0	0	79550	353200	32580	0	0	0	0	0	0
Melanesia1976	0	0	0	0	0	0	0	0	0	0	36487	0	0	0	5	15000	0	0	0	0	0	0	0	0	0	0	9050	0	0	0	0	0	0	0	0	0	0	0	0	0	77929	358000	40528	0	0	0	0	0	0
Melanesia1977	0	0	0	0	0	0	0	0	0	0	35967	0	0	0	5	15000	0	0	0	0	0	0	0	0	0	0	9482	0	0	0	0	0	0	0	0	0	0	0	0	0	82830	357000	43370	0	0	0	0	0	0
Melanesia1978	0	0	0	0	0	0	0	0	0	0	36447	0	0	0	28	15000	0	0	0	0	0	0	0	0	0	0	10266	0	0	0	0	0	0	0	0	0	0	0	0	0	85390	362800	44320	0	0	0	0	0	0
Melanesia1979	0	0	0	0	0	0	0	0	0	0	36337	0	0	0	32	15000	0	0	0	0	0	0	0	0	0	0	10312	0	0	0	0	0	0	0	0	0	0	0	0	0	78557	372700	43550	0	0	0	0	0	0
Melanesia1980	0	0	0	0	0	0	0	0	0	0	36588	0	0	0	27	15000	0	0	0	0	0	0	0	0	0	0	10530	0	0	0	0	0	0	0	0	0	0	0	0	0	81494	329600	43520	0	0	0	0	0	0
Melanesia1981	0	0	0	0	0	0	0	0	0	0	38888	0	0	0	26	15000	0	0	0	0	0	0	0	0	0	0	10901	0	0	0	0	0	0	0	0	0	260	0	0	0	84346	330400	43550	0	0	0	0	0	0
Melanesia1982	0	0	0	0	0	0	0	0	0	0	39638	0	0	0	22	15000	0	0	0	0	0	0	0	0	0	0	11324	0	0	0	0	0	0	0	0	0	200	0	0	0	82230	333200	44460	0	0	0	0	0	0
Melanesia1983	0	0	0	0	0	0	0	0	0	0	37856	0	0	0	25	15500	0	0	0	0	0	0	0	0	0	0	11747	0	0	0	0	0	0	0	0	0	150	0	0	0	84459	340100	47117	0	0	0	0	0	0
Melanesia1984	0	0	0	0	0	0	0	0	0	0	38308	0	0	0	25	15500	0	0	0	0	0	0	0	0	0	0	14936	0	0	0	0	0	0	0	0	0	120	0	0	0	82064	348017	46354	0	0	0	0	0	0
Melanesia1985	0	0	0	0	0	0	0	0	0	0	39345	0	0	0	17	15500	0	0	0	0	0	0	0	0	0	0	15017	0	0	0	0	0	0	0	0	0	100	0	0	0	86534	411020	47308	0	0	0	0	0	0
Melanesia1986	0	0	0	0	0	0	0	0	0	0	39230	0	0	0	18	16000	0	0	0	0	0	0	0	0	0	0	14113	0	0	0	0	0	0	0	0	0	85	0	0	0	95630	410800	47316	0	0	0	0	0	0
Melanesia1987	0	0	0	0	0	0	0	0	0	0	39955	0	0	0	18	16000	0	0	0	0	0	0	0	0	0	0	13105	0	0	0	0	0	0	0	0	0	80	0	0	0	100652	400600	43321	0	0	0	0	0	0
Melanesia1988	0	0	0	0	0	0	0	0	0	0	41508	0	0	0	25	16000	0	0	0	0	0	0	0	0	0	0	12864	0	0	0	0	0	0	0	0	0	70	0	0	0	101292	420000	40945	0	0	0	0	0	0
Melanesia1989	0	0	0	0	0	0	0	0	0	0	43262	0	0	0	25	16000	0	0	0	0	0	0	0	0	0	0	12687	0	0	0	0	0	0	0	0	0	80	0	0	0	106374	421700	41767	0	0	0	0	0	0
Melanesia1990	0	0	0	0	0	0	0	0	0	0	44211	0	0	0	23	16500	0	0	0	0	0	0	0	0	0	0	15258	0	0	0	0	0	0	0	0	0	70	0	0	0	103911	433500	57217	0	0	0	0	0	0
Melanesia1991	0	0	0	0	0	0	0	0	0	0	45164	0	0	0	30	16587	0	0	0	0	0	0	0	0	0	0	12953	0	0	0	0	0	0	0	0	0	70	0	0	0	92944	421385	56293	0	0	0	0	0	0
Melanesia1992	0	0	0	0	0	0	0	0	0	0	46543	0	0	0	35	16775	0	0	0	0	0	0	0	0	0	0	12678	0	0	0	0	0	0	0	0	0	60	0	0	0	103414	434253	46752	0	0	0	0	0	0
Melanesia1993	0	0	0	0	0	0	0	0	0	0	49042	0	0	0	40	16964	0	0	0	0	154	0	0	0	0	0	13845	0	0	0	0	0	0	0	0	0	60	59	0	0	99526	435392	58937	0	0	0	63	0	0
Melanesia1994	0	0	0	0	0	0	0	0	0	0	50629	0	0	0	45	17000	0	0	0	0	177	0	0	0	0	0	12664	0	0	0	0	0	0	0	0	0	55	85	0	0	92168	434926	49453	0	0	0	61	0	0
Melanesia1995	0	0	0	0	0	0	0	0	0	0	52372	0	0	0	46	17354	0	0	0	0	150	0	0	0	0	0	12867	0	0	0	0	0	0	0	0	0	57	100	0	0	82974	436465	50405	0	0	0	70	0	0
Melanesia1996	0	0	0	0	0	0	0	0	0	0	54300	0	0	0	50	17481	0	0	0	0	120	0	0	0	0	0	13626	0	0	0	0	0	0	0	0	0	50	113	0	0	99049	435553	58350	0	0	0	68	0	0
Melanesia1997	0	0	0	0	0	0	0	0	0	0	55830	0	0	0	40	17573	0	0	0	0	100	0	0	0	0	0	15030	0	0	0	0	0	0	0	0	0	40	110	0	0	103500	406653	87262	0	0	0	68	0	0
Melanesia1998	0	0	0	0	0	0	0	0	0	0	56536	0	0	0	45	18000	0	0	0	0	74	0	0	0	0	0	13025	0	0	0	0	0	0	0	0	0	40	124	0	0	107182	437453	81809	0	0	0	69	0	0
Melanesia1999	0	0	0	0	0	0	0	0	0	0	58005	0	0	0	50	18534	0	0	0	0	75	0	0	0	0	0	13522	0	0	0	0	0	0	0	0	0	35	140	0	0	102400	426327	87380	0	0	0	70	0	0
Melanesia2000	0	0	0	0	0	0	0	0	0	0	59681	0	0	0	51	18500	0	0	0	0	80	0	0	0	0	0	13935	0	0	0	0	0	0	0	0	0	10	141	0	0	107300	426366	82236	0	0	0	80	0	0
Melanesia2001	0	0	0	0	0	0	0	0	0	0	61379	0	0	0	55	19500	0	0	0	0	77	0	0	0	0	0	14934	0	0	0	0	0	0	0	0	0	12	143	0	0	97539	373814	66487	0	0	0	72	0	0
Melanesia2002	0	0	0	0	0	0	0	0	0	0	63324	0	0	0	55	19740	0	0	0	0	74	0	0	0	0	0	15560	0	0	0	0	0	0	0	0	0	18	145	0	0	109701	375830	70211	0	0	0	73	0	0
Melanesia2003	0	0	0	0	0	0	0	0	0	0	63955	0	0	0	57	19842	0	0	0	0	70	0	0	0	0	0	15350	0	0	0	0	0	0	0	0	0	35	146	0	0	112300	371740	70205	0	0	0	74	0	0
Melanesia2004	0	0	0	0	0	0	0	0	0	0	64860	0	0	0	60	20000	0	0	0	0	76	0	0	0	0	0	16150	0	0	0	0	0	0	0	0	0	25	147	0	0	108950	354964	57858	0	0	0	75	0	0
Melanesia2005	0	0	0	0	0	0	0	0	0	0	66441	0	0	0	58	20238	0	0	0	0	80	0	0	0	0	0	17450	0	0	0	0	0	0	0	0	0	20	147	0	0	123768	401787	65225	0	0	0	76	0	0
Melanesia2006	0	0	0	0	0	0	0	0	0	0	65239	0	0	0	57	20500	0	0	0	0	75	0	0	0	0	0	18051	0	0	0	0	0	0	0	0	0	15	147	0	0	132452	409180	52229	0	0	0	85	0	0
Melanesia2007	0	0	0	0	0	0	0	0	0	0	67290	0	0	0	58	20700	0	0	0	0	82	0	0	0	0	0	21455	0	0	0	0	0	0	0	0	0	8	147	0	0	132850	471800	55195	0	0	0	78	0	0
Melanesia2008	0	0	0	0	0	0	0	0	0	0	72589	0	0	0	50	20500	0	0	0	0	82	0	0	0	0	0	21335	0	0	0	0	0	0	0	0	0	4	148	0	0	144740	429868	55275	0	0	0	75	0	0
Melanesia2009	0	0	0	0	0	0	0	0	0	0	72543	0	0	0	51	20600	0	0	0	0	81	0	0	0	0	0	19016	0	0	0	0	0	0	0	0	0	3	148	0	0	158170	430895	55115	0	0	0	78	0	0
Melanesia2010	0	0	0	0	0	0	0	0	0	0	72672	0	0	0	51	20800	0	0	0	0	80	0	0	0	0	0	19513	0	0	0	0	0	0	0	0	0	3	148	0	0	111074	431900	49451	0	0	0	81	0	0
Melanesia2011	0	0	0	0	0	0	0	0	0	0	72503	0	0	0	51	20700	0	0	0	0	78	0	0	0	0	0	21389	0	0	0	0	0	0	0	0	0	3	148	0	0	133843	431900	80270	0	0	0	82	0	0
Melanesia2012	0	0	0	0	0	0	0	0	0	0	74673	0	0	0	50	21000	0	0	0	0	85	0	0	0	0	0	24403	0	0	0	0	0	0	0	0	0	3	155	0	0	110852	434000	40926	0	0	0	87	0	0
Melanesia2013	0	0	0	0	0	0	0	0	0	0	76197	0	0	0	52	21131	0	0	0	0	76	0	0	0	0	0	22541	0	0	0	0	0	0	0	0	0	2	146	0	0	117035	429085	46450	0	0	0	83	0	0
Melanesia2014	0	0	0	0	0	0	0	0	0	0	77867	0	0	0	54	21416	0	0	0	0	77	0	0	0	0	0	23015	0	0	0	0	0	0	0	0	0	1	116	0	0	126012	419588	51723	0	0	0	82	0	0
[truncated: 108 more columns]

## Sheet: Micronesia
	Agavefibresnes	Almondswithshell	Anisebadianfennelcoriander	Apples	Apricots	Arecanuts	Artichokes	Asparagus	Avocados	Bambarabeans	Bananas	Barley	Bastfibresother	Beansdry	Beansgreen	Berriesnes	Blueberries	Brazilnutswithshell	Broadbeanshorsebeansdry	Buckwheat	Cabbagesandotherbrassicas	Canaryseed	Carobs	Carrotsandturnips	Cashewapple	Cashewnutswithshell	Cassava	Cassavaleaves	Castoroilseed	Cauliflowersandbroccoli	Cerealsnes	Cherries	Cherriessour	Chestnut	Chickpeas	Chicoryroots	Chilliesandpeppersdry	Chilliesandpeppersgreen	Cinnamoncanella	Cloves	Cocoabeans	Coconuts	Coffeegreen	Coir	Cowpeasdry	Cranberries	Cucumbersandgherkins	Currants	Dates
Micronesia1961	0	0	0	0	0	0	0	0	0	0	930	0	0	0	0	0	0	0	0	0	0	0	0	0	0	0	500	0	0	0	0	0	0	0	0	0	0	0	0	0	40	65612	0	0	0	0	0	0	0
Micronesia1962	0	0	0	0	0	0	0	0	0	0	950	0	0	0	0	0	0	0	0	0	0	0	0	0	0	0	450	0	0	0	0	0	0	0	0	0	0	0	0	0	40	65822	0	0	0	0	0	0	0
Micronesia1963	0	0	0	0	0	0	0	0	0	0	980	0	0	0	0	0	0	0	0	0	0	0	0	0	0	0	450	0	0	0	0	0	0	0	0	0	0	0	0	0	40	54822	0	0	0	0	0	0	0
Micronesia1964	0	0	0	0	0	0	0	0	0	0	1010	0	0	0	0	0	0	0	0	0	0	0	0	0	0	0	450	0	0	0	0	0	0	0	0	0	0	0	0	0	40	58822	0	0	0	0	0	0	0
Micronesia1965	0	0	0	0	0	0	0	0	0	0	975	0	0	0	0	0	0	0	0	0	0	0	0	0	0	0	450	0	0	0	0	0	0	0	0	0	0	0	0	0	45	61878	0	0	0	0	0	0	0
Micronesia1966	0	0	0	0	0	0	0	0	0	0	1015	0	0	0	0	0	0	0	0	0	0	0	0	0	0	0	500	0	0	0	0	0	0	0	0	0	0	0	0	0	50	58156	0	0	0	0	0	0	0
Micronesia1967	0	0	0	0	0	0	0	0	0	0	1035	0	0	0	0	0	0	0	0	0	0	0	0	0	0	0	520	0	0	0	0	0	0	0	0	0	0	0	0	0	50	58156	0	0	0	0	0	0	0
Micronesia1968	0	0	0	0	0	0	0	0	0	0	1065	0	0	0	0	0	0	0	0	0	0	0	0	0	0	0	540	0	0	0	0	0	0	0	0	0	0	0	0	0	50	65591	0	0	0	0	0	0	0
Micronesia1969	0	0	0	0	0	0	0	0	0	0	1078	0	0	0	0	0	0	0	0	0	0	0	0	0	0	0	580	0	0	0	0	0	0	0	0	0	0	0	0	0	50	65591	0	0	0	0	0	0	0
Micronesia1970	0	0	0	0	0	0	0	0	0	0	1102	0	0	0	0	0	0	0	0	0	0	0	0	0	0	0	620	0	0	0	0	0	0	0	0	0	0	0	0	0	50	65591	0	0	0	0	0	0	0
Micronesia1971	0	0	0	0	0	0	0	0	0	0	1121	0	0	0	0	0	0	0	0	0	0	0	0	0	0	0	660	0	0	0	0	0	0	0	0	0	0	0	0	0	50	60336	0	0	0	0	0	0	0
Micronesia1972	0	0	0	0	0	0	0	0	0	0	1139	0	0	0	0	0	0	0	0	0	0	0	0	0	0	0	700	0	0	0	0	0	0	0	0	0	0	0	0	0	50	50336	0	0	0	0	0	0	0
Micronesia1973	0	0	0	0	0	0	0	0	0	0	1160	0	0	0	0	0	0	0	0	0	0	0	0	0	0	0	750	0	0	0	0	0	0	0	0	0	0	0	0	0	50	58340	0	0	0	0	0	0	0
Micronesia1974	0	0	0	0	0	0	0	0	0	0	1190	0	0	0	0	0	0	0	0	0	0	0	0	0	0	0	800	0	0	0	0	0	0	0	0	0	0	0	0	0	52	60340	0	0	0	0	0	0	0
Micronesia1975	0	0	0	0	0	0	0	0	0	0	1210	0	0	0	0	0	0	0	0	0	0	0	0	0	0	0	860	0	0	0	0	0	0	0	0	0	0	0	0	0	54	58679	0	0	0	0	0	0	0
Micronesia1976	0	0	0	0	0	0	0	0	0	0	1230	0	0	0	0	0	0	0	0	0	0	0	0	0	0	0	915	0	0	0	0	0	0	0	0	0	0	0	0	0	56	57250	0	0	0	0	0	0	0
Micronesia1977	0	0	0	0	0	0	0	0	0	0	1240	0	0	0	0	0	0	0	0	0	0	0	0	0	0	0	950	0	0	0	0	0	0	0	0	0	0	0	0	0	58	55300	0	0	0	0	0	0	0
Micronesia1978	0	0	0	0	0	0	0	0	0	0	1245	0	0	0	0	0	0	0	0	0	0	0	0	0	0	0	990	0	0	0	0	0	0	0	0	0	0	0	0	0	60	63320	0	0	0	0	0	0	0
Micronesia1979	0	0	0	0	0	0	0	0	0	0	1251	0	0	0	0	0	0	0	0	0	0	0	0	0	0	0	1000	0	0	0	0	0	0	0	0	0	0	0	0	0	62	65330	0	0	0	0	0	0	0
Micronesia1980	0	0	0	0	0	0	0	0	0	0	1253	0	0	0	0	0	0	0	0	0	0	0	0	0	0	0	1050	0	0	0	0	0	0	0	0	0	0	0	0	0	64	60340	0	0	0	0	0	0	0
Micronesia1981	0	0	0	0	0	0	0	0	0	0	1261	0	0	0	0	0	0	0	0	0	0	0	0	0	0	0	1100	0	0	0	0	0	0	0	0	0	0	0	0	0	66	67345	0	0	0	0	0	0	0
Micronesia1982	0	0	0	0	0	0	0	0	0	0	1266	0	0	0	0	0	0	0	0	0	0	0	0	0	0	0	1150	0	0	0	0	0	0	0	0	0	0	0	0	0	68	66380	0	0	0	0	20	0	0
Micronesia1983	0	0	0	0	0	0	0	0	0	0	1269	0	0	0	0	0	0	0	0	0	0	0	0	0	0	0	1100	0	0	0	0	0	0	0	0	0	0	0	0	0	65	61340	0	0	0	0	17	0	0
Micronesia1984	0	0	0	0	0	0	0	0	0	0	1275	0	0	0	0	0	0	0	0	0	0	0	0	0	0	0	1100	0	0	0	0	0	0	0	0	0	0	0	0	0	67	66400	0	0	0	0	17	0	0
Micronesia1985	0	0	0	0	0	0	0	0	0	0	1271	0	0	0	0	0	0	0	0	0	0	0	0	0	0	0	1100	0	0	0	0	0	0	0	0	0	0	0	0	0	69	74800	0	0	0	0	20	0	0
Micronesia1986	0	0	0	0	0	0	0	0	0	0	1276	0	0	0	0	0	0	0	0	0	0	0	0	0	0	0	1100	0	0	0	0	0	0	0	0	0	0	0	0	0	70	82320	0	0	0	0	22	0	0
Micronesia1987	0	0	0	0	0	0	0	0	0	0	1277	0	0	0	0	0	0	0	0	0	0	0	0	0	0	0	1100	0	0	0	0	0	0	0	0	0	0	0	0	0	70	79920	0	0	0	0	8	0	0
Micronesia1988	0	0	0	0	0	0	0	0	0	0	1257	0	0	0	0	0	0	0	0	0	0	0	0	0	0	0	1100	0	0	0	0	0	0	0	0	0	0	0	0	0	72	75920	0	0	0	0	16	0	0
Micronesia1989	0	0	0	0	0	0	0	0	0	0	1245	0	0	0	0	0	0	0	0	0	0	0	0	0	0	0	1100	0	0	0	0	0	0	0	0	0	0	0	0	0	73	73920	0	0	0	0	15	0	0
Micronesia1990	0	0	0	0	0	0	0	0	0	0	1242	0	0	0	0	0	0	0	0	0	0	0	0	0	0	0	1309	0	0	0	0	0	0	0	0	0	0	0	0	0	74	77248	0	0	0	0	10	0	0
Micronesia1991	0	0	0	0	0	0	0	0	0	0	875	0	0	0	0	0	0	0	0	0	0	0	0	0	0	0	0	0	0	0	0	0	0	0	0	0	0	0	0	0	0	43231	0	0	0	0	10	0	0
Micronesia1992	0	0	0	0	0	0	0	0	0	0	870	0	0	0	0	0	0	0	0	0	0	0	0	0	0	0	0	0	0	0	0	0	0	0	0	0	0	0	0	0	0	48406	0	0	0	0	10	0	0
Micronesia1993	0	0	0	0	0	0	0	0	0	0	868	0	0	0	0	0	0	0	0	0	0	0	0	0	0	0	0	0	0	0	0	0	0	0	0	0	0	0	0	0	0	44599	0	0	0	0	10	0	0
Micronesia1994	0	0	0	0	0	0	0	0	0	0	875	0	0	0	0	0	0	0	0	0	0	0	0	0	0	0	0	0	0	0	0	0	0	0	0	0	0	0	0	0	0	43969	0	0	0	0	10	0	0
Micronesia1995	0	0	0	0	0	0	0	0	0	0	1276	0	0	0	0	0	0	0	0	0	0	0	0	0	0	0	1100	0	0	0	0	0	0	0	0	0	0	0	0	0	77	64304	0	0	0	0	11	0	0
Micronesia1996	0	0	0	0	0	0	0	0	0	0	1297	0	0	0	0	0	0	0	0	0	0	0	0	0	0	0	1111	0	0	0	0	0	0	0	0	0	0	0	0	0	78	71978	0	0	0	0	11	0	0
Micronesia1997	0	0	0	0	0	0	0	0	0	0	1300	0	0	0	0	0	0	0	0	0	0	0	0	0	0	0	1111	0	0	0	0	0	0	0	0	0	0	0	0	0	78	71001	0	0	0	0	11	0	0
Micronesia1998	0	0	0	0	0	0	0	0	0	0	1303	0	0	0	0	0	0	0	0	0	0	0	0	0	0	0	1111	0	0	0	0	0	0	0	0	0	0	0	0	0	78	62017	0	0	0	0	12	0	0
Micronesia1999	0	0	0	0	0	0	0	0	0	0	1299	0	0	0	0	0	0	0	0	0	0	0	0	0	0	0	1111	0	0	0	0	0	0	0	0	0	0	0	0	0	77	60032	0	0	0	0	13	0	0
Micronesia2000	0	0	0	0	0	0	0	0	0	0	1273	0	0	0	0	0	0	0	0	0	0	0	0	0	0	0	1110	0	0	0	0	0	0	0	0	0	0	0	0	0	77	59043	0	0	0	0	14	0	0
Micronesia2001	0	0	0	0	0	0	0	0	0	0	1297	0	0	0	0	0	0	0	0	0	0	0	0	0	0	0	1109	0	0	0	0	0	0	0	0	0	0	0	0	0	77	59077	0	0	0	0	14	0	0
Micronesia2002	0	0	0	0	0	0	0	0	0	0	1350	0	0	0	0	0	0	0	0	0	0	0	0	0	0	0	1107	0	0	0	0	0	0	0	0	0	0	0	0	0	77	59032	0	0	0	0	15	0	0
Micronesia2003	0	0	0	0	0	0	0	0	0	0	1368	0	0	0	0	0	0	0	0	0	0	0	0	0	0	0	1104	0	0	0	0	0	0	0	0	0	0	0	0	0	77	59213	0	0	0	0	15	0	0
Micronesia2004	0	0	0	0	0	0	0	0	0	0	1400	0	0	0	0	0	0	0	0	0	0	0	0	0	0	0	1100	0	0	0	0	0	0	0	0	0	0	0	0	0	77	61392	0	0	0	0	15	0	0
Micronesia2005	0	0	0	0	0	0	0	0	0	0	1434	0	0	0	0	0	0	0	0	0	0	0	0	0	0	0	1095	0	0	0	0	0	0	0	0	0	0	0	0	0	78	61377	0	0	0	0	15	0	0
Micronesia2006	0	0	0	0	0	0	0	0	0	0	1450	0	0	0	0	0	0	0	0	0	0	0	0	0	0	0	1087	0	0	0	0	0	0	0	0	0	0	0	0	0	77	62411	0	0	0	0	16	0	0
Micronesia2007	0	0	0	0	0	0	0	0	0	0	1505	0	0	0	0	0	0	0	0	0	0	0	0	0	0	0	1200	0	0	0	0	0	0	0	0	0	0	0	0	0	80	63483	0	0	0	0	15	0	0
Micronesia2008	0	0	0	0	0	0	0	0	0	0	1535	0	0	0	0	0	0	0	0	0	0	0	0	0	0	0	1051	0	0	0	0	0	0	0	0	0	0	0	0	0	79	63427	0	0	0	0	14	0	0
Micronesia2009	0	0	0	0	0	0	0	0	0	0	1555	0	0	0	0	0	0	0	0	0	0	0	0	0	0	0	1021	0	0	0	0	0	0	0	0	0	0	0	0	0	80	62022	0	0	0	0	15	0	0
Micronesia2010	0	0	0	0	0	0	0	0	0	0	1699	0	0	0	0	0	0	0	0	0	0	0	0	0	0	0	988	0	0	0	0	0	0	0	0	0	0	0	0	0	80	52271	0	0	0	0	15	0	0
Micronesia2011	0	0	0	0	0	0	0	0	0	0	1749	0	0	0	0	0	0	0	0	0	0	0	0	0	0	0	949	0	0	0	0	0	0	0	0	0	0	0	0	0	81	52922	0	0	0	0	15	0	0
Micronesia2012	0	0	0	0	0	0	0	0	0	0	1755	0	0	0	0	0	0	0	0	0	0	0	0	0	0	0	800	0	0	0	0	0	0	0	0	0	0	0	0	0	82	54725	0	0	0	0	16	0	0
Micronesia2013	0	0	0	0	0	0	0	0	0	0	1776	0	0	0	0	0	0	0	0	0	0	0	0	0	0	0	900	0	0	0	0	0	0	0	0	0	0	0	0	0	80	54715	0	0	0	0	15	0	0
Micronesia2014	0	0	0	0	0	0	0	0	0	0	1825	0	0	0	0	0	0	0	0	0	0	0	0	0	0	0	829	0	0	0	0	0	0	0	0	0	0	0	0	0	82	54966	0	0	0	0	15	0	0
[truncated: 108 more columns]

## Sheet: Middle Africa
	Agavefibresnes	Almondswithshell	Anisebadianfennelcoriander	Apples	Apricots	Arecanuts	Artichokes	Asparagus	Avocados	Bambarabeans	Bananas	Barley	Bastfibresother	Beansdry	Beansgreen	Berriesnes	Blueberries	Brazilnutswithshell	Broadbeanshorsebeansdry	Buckwheat	Cabbagesandotherbrassicas	Canaryseed	Carobs	Carrotsandturnips	Cashewapple	Cashewnutswithshell	Cassava	Cassavaleaves	Castoroilseed	Cauliflowersandbroccoli	Cerealsnes	Cherries	Cherriessour	Chestnut	Chickpeas	Chicoryroots	Chilliesandpeppersdry	Chilliesandpeppersgreen	Cinnamoncanella	Cloves	Cocoabeans	Coconuts	Coffeegreen	Coir	Cowpeasdry	Cranberries	Cucumbersandgherkins	Currants	Dates
MiddleAfrica1961	0	0	0	0	0	0	0	0	8200	23500	106700	700	10500	452700	0	0	0	0	0	0	800	0	0	40	3000	0	2164200	0	13300	0	14000	0	0	0	0	0	8000	0	40	0	530900	16000	683700	0	51000	0	60	0	0
MiddleAfrica1962	0	0	0	0	0	0	0	0	8200	24500	107700	700	8630	450100	0	0	0	0	0	0	800	0	0	35	3000	0	2210200	0	13400	0	14000	0	0	0	0	0	8100	0	40	0	532100	17000	836700	0	53000	0	60	0	0
MiddleAfrica1963	0	0	0	0	0	0	0	0	8400	25500	110100	700	9000	452400	0	0	0	0	0	0	700	0	0	30	3000	0	2212200	0	13400	0	14000	0	0	0	0	0	8100	0	40	0	531850	15000	880700	0	56000	0	120	0	0
MiddleAfrica1964	0	0	0	0	0	0	0	0	8300	25500	111000	700	7400	449500	0	0	0	0	0	0	1000	0	0	35	3000	0	2285800	0	13500	0	14000	0	0	0	0	0	9000	0	40	0	530950	17000	878600	0	58000	0	40	0	0
MiddleAfrica1965	0	0	0	0	0	0	0	0	9450	25500	112500	750	8500	448700	0	0	0	0	0	0	900	0	0	90	3000	0	2321200	0	13000	0	14500	0	0	0	0	0	9050	0	40	0	531300	18000	887100	0	58000	0	25	0	0
MiddleAfrica1966	0	0	0	0	0	0	0	0	9450	23500	113000	840	7700	451900	0	0	0	0	0	0	800	0	0	120	3000	0	2350810	0	13000	0	15000	0	0	0	0	0	9100	0	70	0	559815	16000	887533	0	59000	0	30	0	0
MiddleAfrica1967	0	0	0	0	0	0	0	0	9550	23890	114000	882	8600	425390	0	0	0	0	0	0	900	0	0	110	3000	0	2404220	0	13000	0	15000	0	0	0	0	0	9900	0	90	0	544337	16000	943056	0	59000	0	50	0	0
MiddleAfrica1968	0	0	0	0	0	0	0	0	10150	22711	117800	3000	10300	430586	0	0	0	0	0	0	900	0	0	75	3000	0	2440020	0	13000	0	15000	0	0	0	0	0	10000	0	50	0	550900	14000	923433	0	60000	0	50	0	0
MiddleAfrica1969	0	0	0	0	0	0	0	0	10750	27876	125600	3300	11930	441505	0	0	0	0	0	0	800	0	0	58	3000	0	2447630	0	11000	0	15000	0	0	0	0	0	10100	0	50	0	543920	15000	936500	0	60000	0	60	0	0
MiddleAfrica1970	0	0	0	0	0	0	0	0	11250	33374	129900	2500	11650	457880	0	0	0	0	0	0	900	0	0	55	0	3000	2504930	0	11000	0	16000	0	0	0	0	0	10800	0	80	0	567560	13000	969600	0	61400	0	60	0	0
MiddleAfrica1971	0	0	0	0	0	0	0	0	11330	32772	133300	2500	8120	468004	0	0	0	0	0	0	900	0	0	50	0	3000	2549640	0	12000	0	16000	0	0	0	0	0	11600	0	80	0	573322	13000	1045812	0	62100	0	60	0	0
MiddleAfrica1972	0	0	0	0	0	0	0	0	11820	31500	135900	2700	8120	474507	0	0	0	0	0	0	1000	0	0	50	0	3000	2610640	0	12000	0	17000	0	0	0	0	0	11800	0	100	0	480317	14000	1046900	0	65100	0	60	0	0
MiddleAfrica1973	0	0	0	0	0	0	0	0	11900	33801	138200	2300	6860	477020	0	0	0	0	0	0	1000	0	0	50	0	3000	2641530	0	12000	0	17000	0	0	0	0	0	11900	0	110	0	512392	14000	1054861	0	66600	0	60	0	0
MiddleAfrica1974	0	0	0	0	0	0	0	0	11900	34174	140345	829	9300	492091	0	0	0	0	0	0	1000	0	0	50	0	3000	2687132	0	12000	0	18000	0	0	0	0	0	12100	0	100	0	492772	14000	1094618	0	68000	0	60	0	0
MiddleAfrica1975	0	0	0	0	0	0	0	0	11970	41875	145229	351	9400	505400	0	0	0	0	0	0	1000	0	0	50	0	3000	2692210	0	12000	0	19000	0	0	0	0	0	12350	0	100	0	502810	11000	938917	0	68900	0	60	0	0
MiddleAfrica1976	0	0	0	0	0	0	0	0	12100	45258	148572	500	8900	512300	0	0	0	0	0	0	1100	0	0	50	0	3000	2697958	0	12000	0	20000	0	0	0	0	0	12220	0	100	0	559526	10000	830890	0	70900	0	60	0	0
MiddleAfrica1977	0	0	0	0	0	0	0	0	12350	47026	152026	500	8500	520900	0	0	0	0	0	0	1100	0	0	55	0	3000	2785338	0	12000	0	21000	0	0	0	0	0	12300	0	100	0	581459	14000	868002	0	72500	0	65	0	0
MiddleAfrica1978	0	0	0	0	0	0	0	0	12850	23000	156400	500	8090	514500	0	0	0	0	0	0	1100	0	0	55	0	3000	2819770	0	12000	0	30000	0	0	0	0	0	11820	0	100	0	577602	11000	853113	0	72700	0	65	0	0
MiddleAfrica1979	0	0	0	0	0	0	0	0	14670	22200	160400	500	7850	516000	0	0	0	0	0	0	1100	0	0	55	0	3000	2815270	0	12000	0	40000	0	0	0	0	0	13300	0	100	0	581261	14000	861745	0	64800	0	65	0	0
MiddleAfrica1980	0	0	0	0	0	0	0	0	14980	23500	165000	500	8066	521342	0	0	0	0	0	0	1600	0	0	58	0	3000	2885504	0	12000	0	55000	0	0	0	0	0	13400	0	100	0	597652	11000	884088	0	76800	0	70	0	0
MiddleAfrica1981	0	0	0	0	0	0	0	0	15250	27700	170470	500	8070	522200	0	0	0	0	0	0	1700	0	0	58	0	3000	2931872	0	12000	0	70000	0	0	0	0	0	13600	0	100	0	579761	10000	835549	0	79100	0	70	0	0
MiddleAfrica1982	0	0	0	0	0	0	0	0	15550	28700	175700	500	8170	533400	0	0	0	0	0	0	1830	0	0	53	0	3000	2956050	0	12000	0	65000	0	0	0	0	0	13700	0	100	0	560809	13000	880880	0	81300	0	70	0	0
MiddleAfrica1983	0	0	0	0	0	0	0	0	15900	23700	175500	500	8180	562280	0	0	0	0	0	0	1900	0	0	53	0	3000	2913708	0	12000	0	83923	0	0	0	0	0	14200	0	100	0	575500	13000	827270	0	83800	0	70	0	0
MiddleAfrica1984	0	0	0	0	0	0	0	0	16110	24200	179473	500	8300	495887	60	0	0	0	0	0	2100	0	0	53	0	3000	2957924	0	12000	0	48555	0	0	0	0	0	14000	0	100	0	567000	12000	842750	0	86000	0	70	0	0
MiddleAfrica1985	0	0	0	0	88	0	0	0	16260	21000	188928	500	8100	480580	60	0	0	0	0	0	2250	0	0	53	0	3000	2825924	0	12000	0	126448	0	0	20	0	0	14200	0	100	0	573620	16800	844481	0	90100	0	70	0	7660
MiddleAfrica1986	0	0	0	0	88	0	0	0	16280	24200	192600	500	8210	502361	85	0	0	0	0	0	2350	0	0	53	0	3000	2911600	0	12000	0	56750	0	0	40	0	0	14600	0	100	0	556733	16800	808384	0	86300	0	70	0	7660
MiddleAfrica1987	0	0	0	0	88	0	0	0	16540	19900	185033	580	8210	463819	85	0	0	0	0	0	2700	0	0	53	0	3000	2990726	0	12000	0	69856	0	0	50	0	0	14900	0	100	0	586272	16800	732820	0	88100	0	70	0	7660
MiddleAfrica1988	0	0	0	0	88	0	0	0	16700	24000	206055	580	8320	457269	120	0	0	0	0	0	2900	0	0	53	0	3000	3056216	0	12500	0	108743	0	0	60	0	0	15300	0	100	0	567275	16800	720644	0	90000	0	70	0	7660
MiddleAfrica1989	0	0	0	0	88	0	0	0	17020	22400	214674	580	8320	447668	120	0	0	0	0	0	3000	0	0	53	0	3000	3107279	0	13000	0	107724	0	0	70	0	0	15500	0	100	0	569064	15300	725422	0	90800	0	70	0	7660
MiddleAfrica1990	0	0	0	0	90	0	0	0	16574	22944	191732	613	8534	469333	1090	0	0	0	0	0	3300	0	0	50	0	3000	3242784	3500	12500	0	80366	0	0	100	0	0	16002	2000	103	0	505577	16469	605529	0	80000	0	27071	0	7787
MiddleAfrica1991	0	0	0	0	91	0	0	0	17825	22830	232815	501	8540	561430	1110	0	0	0	0	0	3543	0	0	49	0	3000	3301121	3600	14000	0	143958	0	0	100	0	0	15675	2100	206	0	478184	17747	660553	0	70000	0	36076	0	6888
MiddleAfrica1992	0	0	0	0	92	0	0	0	17074	19800	230878	531	8675	594655	1145	0	0	0	0	0	3698	0	0	48	0	2740	3388451	3700	14321	0	123811	0	0	100	0	0	15143	2300	207	0	481171	16176	589149	0	73000	0	45076	0	6838
MiddleAfrica1993	0	0	0	0	92	0	0	0	17165	20900	236951	581	8866	605324	1179	0	0	0	0	0	3900	0	0	47	0	2800	3349543	3800	13500	0	114385	0	0	100	0	0	15207	2500	207	0	434005	16739	605825	0	71497	0	55076	0	6909
MiddleAfrica1994	0	0	0	0	94	0	0	0	17791	22000	235806	650	8940	803644	1232	0	0	0	0	0	4208	0	0	46	0	2300	3384264	3900	13000	0	132266	0	0	100	0	0	14578	2700	208	0	469114	16794	570556	0	83291	0	64075	0	6960
MiddleAfrica1995	0	0	0	0	94	0	0	0	17267	23500	203321	641	9040	639673	1246	0	0	0	0	0	4364	0	0	45	0	2394	3109469	4000	13500	0	104423	0	0	100	0	0	14806	2900	209	0	464961	16320	537054	0	92000	0	72077	0	7033
MiddleAfrica1996	0	0	0	0	95	0	0	0	16897	24596	210534	658	9240	598766	2090	0	0	0	0	0	4280	0	0	93	0	2500	3160035	4100	13650	0	96370	0	0	100	0	0	13941	3200	210	0	480053	17847	579709	0	110000	0	82078	0	7104
MiddleAfrica1997	0	0	0	0	95	0	0	0	17185	25492	202209	676	9535	634790	2341	0	0	0	0	0	4240	0	0	82	0	2800	3123647	4200	13992	0	116503	0	0	100	0	0	13408	3500	211	0	484023	18437	570224	0	124000	0	90076	0	7175
MiddleAfrica1998	0	0	0	0	97	0	0	0	17465	25700	205508	691	9182	771871	2134	0	0	0	0	0	4281	0	0	83	0	3000	3296072	4300	13681	0	184337	0	0	100	0	0	12340	3700	212	0	476483	17168	632138	0	140000	0	100075	0	7250
MiddleAfrica1999	0	0	0	0	97	0	0	0	19682	23924	220269	700	9424	663352	2559	0	0	0	200	0	4480	0	0	77	0	2500	3074497	4400	13000	0	202384	0	0	100	0	0	10972	4563	212	0	480394	18291	535848	0	154000	0	104893	0	7328
MiddleAfrica2000	0	0	0	0	100	0	0	0	22323	24772	241205	780	9538	763847	2588	0	0	0	221	0	4373	0	0	83	0	2800	3014616	4500	13500	0	143866	0	0	100	0	0	12919	4563	213	0	477065	18702	480776	0	172000	0	105637	0	7402
MiddleAfrica2001	0	0	0	0	99	0	0	0	22296	28246	219355	778	9387	802900	2627	0	0	0	225	0	4083	0	0	93	0	2753	3084438	4600	14134	0	157801	0	0	100	0	0	13072	4570	214	0	466062	19244	408676	0	195809	0	100369	0	7483
MiddleAfrica2002	0	0	0	0	103	0	0	0	22606	30084	233440	777	9044	712453	2672	0	0	0	228	0	4059	0	0	105	0	2800	3065947	4700	14359	0	182200	0	0	100	0	0	13307	5507	215	0	442909	19623	277502	0	203948	0	98169	0	7565
MiddleAfrica2003	0	0	0	0	104	0	0	0	22690	31732	238323	774	9256	845666	2693	0	0	0	232	0	4349	0	0	105	0	2800	3220964	4800	14579	0	303220	0	0	100	0	0	14886	6104	216	0	536453	19865	294681	0	215629	0	121963	0	7290
MiddleAfrica2004	0	0	0	0	105	0	0	0	23105	35571	251275	902	9263	823547	2734	0	0	0	235	0	4236	0	0	110	0	2800	3208590	5000	14675	0	303616	0	0	100	0	0	15010	6765	217	0	569841	19068	298042	0	248683	0	115288	0	7506
MiddleAfrica2005	0	0	0	0	116	0	0	0	23539	38943	273567	998	9120	800710	2744	0	0	0	235	0	4232	0	0	107	0	2800	3257417	5200	14772	0	366078	0	0	100	0	0	14870	3317	219	0	473544	20701	309394	0	214801	0	86989	0	7554
MiddleAfrica2006	0	0	0	0	123	0	0	0	24152	39259	282405	1033	9270	770558	2757	0	0	0	236	0	4420	0	0	108	0	2800	3351876	5465	14542	0	363720	0	0	100	0	0	15277	3849	218	0	502931	19773	322026	0	233206	0	96594	0	7713
MiddleAfrica2007	0	0	0	0	130	0	0	0	23770	46438	251145	1037	9644	942784	2758	0	0	0	237	0	11968	0	0	98	0	2800	3328709	6352	14784	0	459957	0	0	100	0	0	18873	10076	220	0	625480	17291	280328	0	236890	0	112495	0	7825
MiddleAfrica2008	0	0	0	0	135	0	0	0	24466	48245	286225	957	9862	912295	2810	0	0	0	238	0	46573	0	0	108	0	2800	3163834	6904	14943	0	336350	0	0	100	0	0	20232	11038	220	0	655288	18213	289113	0	241374	0	154280	0	8358
MiddleAfrica2009	0	0	0	0	145	0	0	0	24446	53805	308399	1134	10327	1223429	2805	0	0	0	242	0	74369	0	0	112	0	2800	3395398	7472	15133	0	448750	0	0	100	0	0	20988	12008	222	0	659481	20272	309571	0	368154	0	175813	0	8732
MiddleAfrica2010	0	0	0	0	150	0	0	0	25028	53803	313755	1200	10700	1364046	2850	0	0	0	230	0	75817	0	0	115	0	2800	3501210	8153	15000	0	1111433	0	0	120	0	0	21433	13252	228	0	732265	20317	357496	0	388877	0	186165	0	9028
MiddleAfrica2011	0	0	0	0	154	0	0	0	25704	72255	343965	1282	10599	1744516	2828	0	0	0	250	0	89390	0	0	118	0	2800	3672776	7700	16000	0	308027	0	0	130	0	0	23159	14178	225	0	738040	16805	227171	0	326248	0	203132	0	9500
MiddleAfrica2012	0	0	0	0	150	0	0	0	25603	66460	349870	1400	10896	1436103	2750	0	0	0	275	0	83896	0	0	120	0	2800	3737006	8496	16000	0	426060	0	0	132	0	0	24076	18640	220	0	722855	16800	267393	0	269853	0	208923	0	10150
MiddleAfrica2013	0	0	0	0	165	0	0	0	26557	67751	367940	1400	10900	1716067	2812	0	0	0	270	0	86478	0	0	126	0	2800	3762245	7835	16000	0	467661	0	0	137	0	0	25012	17890	234	0	734808	17950	275948	0	390325	0	204548	0	10147
MiddleAfrica2014	0	0	0	0	169	0	0	0	26879	68751	373580	1435	11004	1729251	2931	0	0	0	257	0	88222	0	0	123	0	2856	3380151	7397	15922	0	536934	0	0	122	0	0	25706	17536	230	0	743992	19680	276102	0	368964	0	208809	0	10411
[truncated: 108 more columns]

[truncated: 13 more sheets: Northern Africa, North America, Northern Europe, Polynesia, Southeast Asia, South America, South Africa, South Asia, South Europe, West Africa, West Asia, West Europe, World]
